# Supplementary material
Source: PubMed Central journal article supplement (PMC9346550)
Supplement: jama-e2211390-s001.pdf [file jama-e2211390-s001.pdf]

## Supplemental Online Content

Cipolletta E, Tata LJ, Nakafero G, Avery AJ, Mamas MA, Abhishek A. Association between gout flare and subsequent cardiovascular events among patients with gout. *JAMA*. doi:10.1001/jama.2022.11390

**eMethod 1.** Rationale for Definition of Gout Flare Used in the Current Study

**eMethod 2.** Rationale for Self-Controlled Case Series Sensitivity Analyses

**eMethod 3.** Sample Size Estimation

**eMethod 4.** European Society of Cardiology (ESC) Cardiovascular Risk Categories

**eTable 1.** Codelists for Case, Exposure and Covariate Definition

**eTable 2.** Association Between Cardiovascular Events and Recent Prior Gout Flare: Sensitivity Analyses of the Nested Case-Control Study

**eTable 3.** Sensitivity Analyses of the Self-Controlled Case Series Analysis for Patients With the First Gout Flare After Gout Diagnosis and a Cardiovascular Event

**eFigure 1.** Self-Controlled Case Series: Schematic Description

**eFigure 2.** Cohort Development in a Self-Controlled Case-Series Study of Cardiovascular Events After New Diagnosis of Gout

**eReferences.**

This supplemental material has been provided by the authors to give readers additional information about their work.

## eMETHODS

### 1. Rationale for definition of gout flare used in the current study

Zheng et al. used data from 3.6 million people registered with the Kaiser Permanente Southern California database (gathering data from 14 hospitals and 202 family doctors) and found a positive predictive value of claims-based gout flare definition using consultation and prescription/procedure to be 95% [1]. They allowed a 7-day window between diagnosis, and either qualifying prescriptions or procedures to happen. We modified this definition to require the consultation and prescription to occur on the same date to minimize the chances of misclassifications, as steroids and NSAIDs may be prescribed for other reasons such as asthma and pain due to osteoarthritis, respectively.

In a single tertiary center study, restricting the window from 7 days to 1 day improved the positive predictive value of a similar gout flare definition [2]. Furthermore, a flare algorithm more parsimonious than the one used in the present study, including the prescription of colchicine without Read codes for gout and with a 7-day window for prescriptions and consultations was validated against a manual review of 100 random UK primary-care chart samples by Rothenbacher et al. [3]. However, they only reported the results narratively and the positive predictive value of such approach was not published.

### 2. Rationale for self-controlled case series sensitivity analyses

The self-controlled case series method relies on three main assumptions. First, the occurrence of an outcome should not appreciably affect subsequent outcomes [4]. As cardiovascular events can recur, and, therefore, this assumption could be violated, we considered only the first cardiovascular event during the study period. This strategy has been shown to be a valid approach to overcoming this potential bias [4]. Second, the occurrence of an outcome should not alter the probability of subsequent exposures. Since acute conditions such as cardiovascular events may temporarily increase the probability of gout flares, we included a pre-exposure period into the baseline period and a 30-day induction interval to reduce this potential bias [4]. Third, the outcome should not increase the probability of death. However, the self-controlled case series method has successfully been applied to outcomes that increase mortality [5-7]. Nevertheless, we ran a sensitivity analysis excluding subjects with fatal cardiovascular events within the study period to account for it [4].

### 3. Sample size estimation:

**Nested case control study** A total of 62,234 incident gout patients were ascertained in the Clinical Practice Research Datalink between 1998 and 2017 in an earlier study [8]. In another study, 38% of patients with gout experienced at least one gout flare in a 3.8-year follow-up period [3,9]. Given these estimates, we expected to have at least 20,000 gout patients that consulted for at least one gout flare in the Clinical Practice Research Datalink between 1997-2011, with an additional equal number of consultations for gout flare in the period between 2011 and 2020 given the increased prevalence of gout over time [3].

Previous research using Clinical Practice Research Datalink demonstrated approximately 10% incident gout patients developed cardiovascular events [8,10–13]. Thus, assuming at least 6,500 individuals with cardiovascular events, 1.0% of controls with an exposure of interest, and a case-control ratio of 1:5, the study has 87% power to detect an odds ratio of at-least 1.50 or greater with a type I error of 2.5% (STATA command “power mcc”).

**Self-controlled case series** As outlined above, we expected at least 6,500 individuals with cardiovascular events. For an at-risk period of 180 days, a baseline period of 510 days, 100% of cases exposed during the observational period, the study had 95% power to detect an incidence rate ratio associated with the exposure of 1.5 with a type I error of 2.5% provided there were 437 cardiovascular events in the exposed period (STATA command “sampsi\_sccs”).

### 4. European Society of Cardiology (ESC) cardiovascular risk categories:

According to the European Society of Cardiology, very-high cardiovascular risk was defined as any of the following: eGFR <30 ml/min/1.73 m<sup>2</sup>, diabetes mellitus with target organ damage or at least three major cardiovascular risk factors, type 1 diabetes mellitus with a disease duration for >20 years, familiar hypercholesterolemia with atherosclerotic cardiovascular disease or with another major risk factor, or documented atherosclerotic cardiovascular disease either clinical or unequivocal by imaging. High cardiovascular risk was defined as any of the following: markedly elevated single risk factors (e.g., total cholesterol >310 mg/dl, LDL cholesterol >190 mg/dl, blood pressure >180/110 mmHg), familiar hypercholesterolemia without other major risk factors, diabetes mellitus without target organ damage + disease duration >10 years + an additional risk factor, eGFR 30-59 ml/min/1.73 m<sup>2</sup> [14].

**eTable 1. Codelists for Case, Exposure, and Covariate Definition****Acute coronary syndrome or ischaemic heart disease prior to gout diagnosis**

| <b>Medcode</b> | <b>Readcode</b> | <b>Readterm</b>                                              |
|----------------|-----------------|--------------------------------------------------------------|
| 737            | 792..11         | Coronary artery bypass graft operations                      |
| 3159           | 792Dy00         | Other specified other bypass of coronary artery              |
| 5030           | ZV45K00         | [V]Presence of coronary artery bypass graft                  |
| 5674           | ZV45K11         | [V]Presence of coronary artery bypass graft - CABG           |
| 5744           | 7927500         | Open angioplasty of coronary artery                          |
| 7134           | 7921.11         | Other autograft bypass of coronary artery                    |
| 7137           | 7920y00         | Saphenous vein graft replacement of coronary artery OS       |
| 7442           | 7920200         | Saphenous vein graft replacement of three coronary arteries  |
| 7609           | 7921z00         | Other autograft replacement of coronary artery NOS           |
| 7634           | 7920100         | Saphenous vein graft replacement of two coronary arteries    |
| 8312           | 7920.11         | Saphenous vein graft bypass of coronary artery               |
| 8679           | 7920000         | Saphenous vein graft replacement of one coronary artery      |
| 9414           | 7921            | Other autograft replacement of coronary artery               |
| 10209          | 7921200         | Autograft replacement of three coronary arteries NEC         |
| 11610          | 7920300         | Saphenous vein graft replacement of four+ coronary arteries  |
| 12734          | SP07600         | Coronary artery bypass graft occlusion                       |
| 18249          | 7920            | Saphenous vein graft replacement of coronary artery          |
| 18913          | ZV45700         | [V]Presence of aortocoronary bypass graft                    |
| 19193          | 7923z00         | Prosthetic replacement of coronary artery NOS                |
| 19402          | 7923            | Prosthetic replacement of coronary artery                    |
| 19413          | 7921100         | Autograft replacement of two coronary arteries NEC           |
| 22647          | 7925311         | LIMA single anastomosis                                      |
| 28837          | 7925.11         | Creation of bypass from mammary artery to coronary artery    |
| 31519          | 7925100         | Double implant of mammary arteries into coronary arteries    |
| 31540          | 7924200         | Revision of bypass for three coronary arteries               |
| 31556          | 7922            | Allograft replacement of coronary artery                     |
| 32651          | 7922.11         | Allograft bypass of coronary artery                          |
| 33461          | 7924            | Revision of bypass for coronary artery                       |
| 33471          | 792Dz00         | Other bypass of coronary artery NOS                          |
| 33718          | 7925000         | Double anastomosis of mammary arteries to coronary arteries  |
| 34963          | 792D.00         | Other bypass of coronary artery                              |
| 36011          | 7923.11         | Prosthetic bypass of coronary artery                         |
| 37682          | 7925            | Connection of mammary artery to coronary artery              |
| 37719          | 7925y00         | Connection of mammary artery to coronary artery OS           |
| 42708          | 7921300         | Autograft replacement of four of more coronary arteries NEC  |
| 44561          | 7921000         | Autograft replacement of one coronary artery NEC             |
| 45370          | 7922300         | Allograft replacement of four or more coronary arteries      |
| 45886          | 7922200         | Allograft replacement of three coronary arteries             |
| 48767          | 7922z00         | Allograft replacement of coronary artery NOS                 |
| 51507          | 7925300         | Single anastomosis of mammary artery to coronary artery NEC  |
| 51515          | 7920z00         | Saphenous vein graft replacement coronary artery NOS         |
| 52938          | 7924000         | Revision of bypass for one coronary artery                   |
| 55092          | 792C000         | Replacement of coronary arteries using multiple methods      |
| 55598          | 792C.00         | Other replacement of coronary artery                         |
| 56990          | 7925z00         | Connection of mammary artery to coronary artery NOS          |
| 57241          | 7922100         | Allograft replacement of two coronary arteries               |
| 57634          | 7924z00         | Revision of bypass for coronary artery NOS                   |
| 59423          | 7922y00         | Other specified allograft replacement of coronary artery     |
| 60753          | 7926300         | Single implantation thoracic artery into coronary artery NEC |
| 61310          | 7921y00         | Other autograft replacement of coronary artery OS            |
| 62608          | 7926000         | Double anastom thoracic arteries to coronary arteries NEC    |
| 66236          | 7923200         | Prosthetic replacement of three coronary arteries            |
| 66664          | 7923100         | Prosthetic replacement of two coronary arteries              |

|        |          |                                                              |
|--------|----------|--------------------------------------------------------------|
| 67554  | 7924100  | Revision of bypass for two coronary arteries                 |
| 67591  | 7926200  | Single anastomosis of thoracic artery to coronary artery NEC |
| 67761  | 7923300  | Prosthetic replacement of four or more coronary arteries     |
| 68123  | 7925312  | RIMA single anastomosis                                      |
| 68139  | 7925400  | Single implantation of mammary artery into coronary artery   |
| 69776  | SP00300  | Mechanical complication of coronary bypass                   |
| 70111  | 7922000  | Allograft replacement of one coronary artery                 |
| 70755  | 792Cz00  | Replacement of coronary artery NOS                           |
| 72780  | 7926z00  | Connection of other thoracic artery to coronary artery NOS   |
| 92419  | 7923000  | Prosthetic replacement of one coronary artery                |
| 93828  | 792Cy00  | Other specified replacement of coronary artery               |
| 96804  | 7926     | Connection of other thoracic artery to coronary artery       |
| 97953  | 7924y00  | Other specified revision of bypass for coronary artery       |
| 101569 | 7924300  | Revision of bypass for four or more coronary arteries        |
| 18643  | ZV45800  | [V]Presence of coronary angioplasty implant and graft        |
| 6980   | ZV45L00  | [V]Status following coronary angioplasty NOS                 |
| 2901   | 7928     | Transluminal balloon angioplasty of coronary artery          |
| 5703   | 7928.11  | Percutaneous balloon coronary angioplasty                    |
| 18670  | 7928000  | Percut transluminal balloon angioplasty one coronary artery  |
| 33735  | 7928100  | Percut translum balloon angioplasty mult coronary arteries   |
| 42462  | 7928200  | Percut translum balloon angioplasty bypass graft coronary a  |
| 86071  | 7928300  | Percut translum cutting balloon angioplasty coronary artery  |
| 41547  | 7928y00  | Transluminal balloon angioplasty of coronary artery OS       |
| 732    | 7928z00  | Transluminal balloon angioplasty of coronary artery NOS      |
| 22828  | 7929000  | Percutaneous transluminal laser coronary angioplasty         |
| 19046  | 7929300  | Rotary blade coronary angioplasty                            |
| 8942   | 7929400  | Insertion of coronary artery stent                           |
| 42304  | 7929500  | Insertion of drug-eluting coronary artery stent              |
| 93618  | 7929600  | Percutaneous transluminal atherectomy of coronary artery     |
| 22020  | 792B000  | Endarterectomy of coronary artery NEC                        |
| 105184 | 792E.00  | Percutaneous coronary intervention                           |
| 107406 | 7.92E+02 | Emergency percutaneous coronary intervention                 |
| 43939  | 793G.00  | Perc translumin balloon angioplasty stenting coronary artery |
| 60067  | 793G000  | Perc translum ball angio insert 1-2 drug elut stents cor art |
| 87849  | 793G100  | Perc tran ball angio ins 3 or more drug elut stents cor art  |
| 85947  | 793G200  | Perc translum balloon angioplasty insert 1-2 stents cor art  |
| 92927  | 793G300  | Percutaneous cor balloon angiop 3 more stents cor art NEC    |
| 96537  | 793Gy00  | OS perc translumina balloon angioplast stenting coronary art |
| 61208  | 793Gz00  | Perc translum balloon angioplasty stenting coronary art NOS  |
| 733    | 7A54000  | Percutaneous transluminal angioplasty of artery NEC          |
| 38813  | 7A54500  | Rotary blade angioplasty                                     |
| 70185  | 7A54800  | Percutaneous transluminal atherectomy                        |
| 86773  | 7A56400  | Percutaneous transluminal balloon angioplasty of artery      |
| 20903  | 7A6G100  | Peroperative angioplasty                                     |
| 64923  | 7A6H300  | Prosthetic graft patch angioplasty                           |
| 66921  | 7A6H400  | Percutaneous transluminal angioplasty of vascular graft      |
| 8246   | 322..00  | ECG: myocardial ischaemia                                    |
| 26973  | 3222     | ECG:shows myocardial ischaemia                               |
| 35287  | 322Z.00  | ECG: myocardial ischaemia NOS                                |
| 42104  | 32E4.00  | ECG: S-T depression                                          |
| 26965  | 32F2.00  | ECG: T wave abnormal                                         |
| 46230  | 32F3.00  | ECG: T wave flattened                                        |
| 26967  | 32F4.00  | ECG: T wave inverted                                         |
| 26966  | 32E3.00  | ECG: S-T elevation                                           |
| 7783   | 323..00  | ECG: myocardial infarction                                   |
| 39904  | 3232     | ECG: old myocardial infarction                               |
| 26975  | 3233     | ECG: antero-septal infarct.                                  |
| 26972  | 3234     | ECG:posterior/inferior infarct                               |
| 100496 | 8CEJ.00  | Coronary heart disease leaflet given                         |

|        |         |                                                              |
|--------|---------|--------------------------------------------------------------|
| 103932 | 8CMP.00 | Coronary heart disease care plan                             |
| 8516   | 8F9..00 | Cardiac rehabilitation                                       |
| 37990  | 8F90.00 | Cardiac rehabilitation - phase 1                             |
| 37991  | 8F91.00 | Cardiac rehabilitation - phase 2                             |
| 41032  | 8F92.00 | Cardiac rehabilitation - phase 3                             |
| 46565  | 8F93.00 | Cardiac rehabilitation - phase 4                             |
| 104675 | 8F97.00 | Cardiac rehabilitation programme completed                   |
| 110535 | 8F98.00 | Cardiac rehabilitation programme offered                     |
| 10127  | 8H7v.00 | Referral to cardiac rehabilitation nurse                     |
| 102447 | 8Hkk.00 | Referral to cardiac rehabilitation programme                 |
| 102943 | 8Hkl.00 | Referral to cardiac rehabilitation service by secondary care |
| 19744  | 8I37.00 | Coronary heart disease monitoring refused                    |
| 19250  | 8I3a.00 | Cardiac rehabilitation declined                              |
| 18150  | 9Ob..00 | Coronary heart disease monitoring administration             |
| 35373  | 9Ob0.00 | Attends coronary heart disease monitoring                    |
| 35277  | 9Ob1.00 | Refuses coronary heart disease monitoring                    |
| 47798  | 9Ob2.00 | Coronary heart disease monitoring default                    |
| 25814  | 9Ob3.00 | Coronary heart disease monitoring 1st letter                 |
| 34207  | 9Ob4.00 | Coronary heart disease monitoring 2nd letter                 |
| 34329  | 9Ob5.00 | Coronary heart disease monitoring 3rd letter                 |
| 37908  | 9Ob6.00 | Coronary heart disease monitoring verbal invitation          |
| 54007  | 9Ob7.00 | Coronary heart disease monitoring deleted                    |
| 39500  | 9Ob8.00 | Coronary heart disease monitoring check done                 |
| 70160  | 9Ob9.00 | Coronary heart disease monitoring telephone invite           |
| 6331   | G341.00 | Aneurysm of heart                                            |
| 27484  | G341.11 | Cardiac aneurysm                                             |
| 2155   | G341000 | Ventricular cardiac aneurysm                                 |
| 67087  | G341100 | Other cardiac wall aneurysm                                  |
| 105250 | G341111 | Mural cardiac aneurysm                                       |
| 41677  | G341z00 | Aneurysm of heart NOS                                        |
| 18218  | Z677.00 | Cardiac rehabilitation class                                 |
| 19067  | ZL22200 | Under care of cardiac rehabilitation nurse                   |
| 23098  | ZV57900 | [V]Cardiac rehabilitation                                    |
| 18135  | 6A2..00 | Coronary heart disease annual review                         |
| 10260  | 6A4..00 | Coronary heart disease review                                |
| 11648  | 8B3k.00 | Coronary heart disease medication review                     |
| 95550  | 8H2V.00 | Admit ischaemic heart disease emergency                      |
| 27951  | G31..00 | Other acute and subacute ischaemic heart disease             |
| 61072  | G311000 | Myocardial infarction aborted                                |
| 55137  | G311011 | MI - myocardial infarction aborted                           |
| 9413   | G31y.00 | Other acute and subacute ischaemic heart disease             |
| 39693  | G31y200 | Subendocardial ischaemia                                     |
| 21844  | G31y300 | Transient myocardial ischaemia                               |
| 27977  | G31yz00 | Other acute and subacute ischaemic heart disease NOS         |
| 5413   | G340.00 | Coronary atherosclerosis                                     |
| 1344   | G340.12 | Coronary artery disease                                      |
| 7320   | G343.00 | Ischaemic cardiomyopathy                                     |
| 29421  | G344.00 | Silent myocardial ischaemia                                  |
| 18889  | G34z000 | Asymptomatic coronary heart disease                          |
| 22383  | G3y..00 | Other specified ischaemic heart disease                      |
| 1676   | G3z..00 | Ischaemic heart disease NOS                                  |
| 52517  | Gyu3.00 | [X]Ischaemic heart diseases                                  |
| 68401  | Gyu3200 | [X]Other forms of acute ischaemic heart disease              |
| 33650  | 7929100 | Percut transluminal coronary thrombolysis with streptokinase |
| 40996  | 7929111 | Percut translum coronary thrombolytic therapy- streptokinase |
| 94504  | 8B3a.00 | Door to needle time                                          |
| 70440  | 8B3g.00 | Pain to thrombolysis time                                    |
| 35674  | 14A3.00 | H/O: myocardial infarct <60                                  |
| 40399  | 14A4.00 | H/O: myocardial infarct >60                                  |

|        |         |                                                              |
|--------|---------|--------------------------------------------------------------|
| 50372  | 14AH.00 | H/O: Myocardial infarction in last year                      |
| 100139 | 14AT.00 | History of myocardial infarction                             |
| 23579  | G310.00 | Postmyocardial infarction syndrome                           |
| 4017   | G32..00 | Old myocardial infarction                                    |
| 16408  | G32..11 | Healed myocardial infarction                                 |
| 17464  | G32..12 | Personal history of myocardial infarction                    |
| 9555   | G33z500 | Post infarct angina                                          |
| 36423  | G36..00 | Certain current complication follow acute myocardial infarct |
| 24126  | G360.00 | Haemopericardium/current comp folow acut myocard infarct     |
| 23708  | G361.00 | Atrial septal defect/curr comp folow acut myocardial infarct |
| 37657  | G362.00 | Ventric septal defect/curr comp fol acut myocardal infarctn  |
| 59189  | G363.00 | Ruptur cardiac wall w'out haemopericard/cur comp fol ac MI   |
| 59940  | G364.00 | Ruptur chordae tendinae/curr comp fol acute myocard infarct  |
| 69474  | G365.00 | Rupture papillary muscle/curr comp fol acute myocard infarct |
| 29553  | G366.00 | Thrombosis atrium,auric append&vent/curr comp foll acute MI  |
| 35119  | G501.00 | Post infarction pericarditis                                 |
| 61670  | 889A.00 | Diab mellit insulin-glucose infus acute myocardial infarct   |
| 241    | G30..00 | Acute myocardial infarction                                  |
| 13566  | G30..11 | Attack - heart                                               |
| 2491   | G30..12 | Coronary thrombosis                                          |
| 30421  | G30..13 | Cardiac rupture following myocardial infarction (MI)         |
| 1204   | G30..14 | Heart attack                                                 |
| 1677   | G30..15 | MI - acute myocardial infarction                             |
| 13571  | G30..16 | Thrombosis - coronary                                        |
| 17689  | G30..17 | Silent myocardial infarction                                 |
| 12139  | G300.00 | Acute anterolateral infarction                               |
| 5387   | G301.00 | Other specified anterior myocardial infarction               |
| 40429  | G301000 | Acute anteroapical infarction                                |
| 17872  | G301100 | Acute anteroseptal infarction                                |
| 14897  | G301z00 | Anterior myocardial infarction NOS                           |
| 8935   | G302.00 | Acute inferolateral infarction                               |
| 29643  | G303.00 | Acute inferoposterior infarction                             |
| 23892  | G304.00 | Posterior myocardial infarction NOS                          |
| 14898  | G305.00 | Lateral myocardial infarction NOS                            |
| 63467  | G306.00 | True posterior myocardial infarction                         |
| 3704   | G307.00 | Acute subendocardial infarction                              |
| 9507   | G307000 | Acute non-Q wave infarction                                  |
| 1678   | G308.00 | Inferior myocardial infarction NOS                           |
| 30330  | G309.00 | Acute Q-wave infarct                                         |
| 17133  | G30A.00 | Mural thrombosis                                             |
| 32854  | G30B.00 | Acute posterolateral myocardial infarction                   |
| 29758  | G30X.00 | Acute transmural myocardial infarction of unspecif site      |
| 34803  | G30y.00 | Other acute myocardial infarction                            |
| 28736  | G30y000 | Acute atrial infarction                                      |
| 62626  | G30y100 | Acute papillary muscle infarction                            |
| 41221  | G30y200 | Acute septal infarction                                      |
| 46017  | G30yz00 | Other acute myocardial infarction NOS                        |
| 14658  | G30z.00 | Acute myocardial infarction NOS                              |
| 15661  | G310.11 | Dressler's syndrome                                          |
| 68357  | G31y100 | Microinfarction of heart                                     |
| 18842  | G35..00 | Subsequent myocardial infarction                             |
| 45809  | G350.00 | Subsequent myocardial infarction of anterior wall            |
| 38609  | G351.00 | Subsequent myocardial infarction of inferior wall            |
| 72562  | G353.00 | Subsequent myocardial infarction of other sites              |
| 46166  | G35X.00 | Subsequent myocardial infarction of unspecified site         |
| 32272  | G38..00 | Postoperative myocardial infarction                          |
| 46112  | G380.00 | Postoperative transmural myocardial infarction anterior wall |
| 46276  | G381.00 | Postoperative transmural myocardial infarction inferior wall |
| 106812 | G383.00 | Postoperative transmural myocardial infarction unspec site   |

|        |         |                                                            |
|--------|---------|------------------------------------------------------------|
| 41835  | G384.00 | Postoperative subendocardial myocardial infarction         |
| 68748  | G38z.00 | Postoperative myocardial infarction, unspecified           |
| 96838  | Gyu3400 | [X]Acute transmural myocardial infarction of unspecif site |
| 109035 | Gyu3500 | [X]Subsequent myocardial infarction of other sites         |
| 99991  | Gyu3600 | [X]Subsequent myocardial infarction of unspecified site    |
| 10562  | G307100 | Acute non-ST segment elevation myocardial infarction       |
| 12229  | G30X000 | Acute ST segment elevation myocardial infarction           |
| 21195  | G575100 | Sudden cardiac death, so described                         |
| 36523  | G311.00 | Preinfarction syndrome                                     |
| 4656   | G311.11 | Crescendo angina                                           |
| 39655  | G311.12 | Impending infarction                                       |
| 1431   | G311.13 | Unstable angina                                            |
| 19655  | G311.14 | Angina at rest                                             |
| 7347   | G311100 | Unstable angina                                            |
| 17307  | G311200 | Angina at rest                                             |
| 34328  | G311300 | Refractory angina                                          |
| 18118  | G311400 | Worsening angina                                           |
| 54251  | G311z00 | Preinfarction syndrome NOS                                 |
| 39449  | G312.00 | Coronary thrombosis not resulting in myocardial infarction |
| 9276   | G31y000 | Acute coronary insufficiency                               |
| 66388  | G33z000 | Status anginosus                                           |
| 303771 | 4109TC  | THROMBOSIS CORONARY                                        |
| 306424 | 4109NC  | CORONARY INFARCTION                                        |

**ICD-10 code**

|                       |                                             |
|-----------------------|---------------------------------------------|
| I20 (0)               | Unstable angina                             |
| I21 (0,1,2,3,4,9)     | Acute myocardial infarction                 |
| I22 (0,1,2,8,9)       | Subsequent myocardial infarction            |
| I23 (0,1,2,3,4,5,6,8) | Certain current complications following AMI |
| I24 (0,2,8,9)         | Other acute ischaemic heart disease         |

**Stroke prior to gout diagnosis**

| Medcode | Readcode | Readterm                                                     |
|---------|----------|--------------------------------------------------------------|
| 28914   | 662o.00  | Haemorrhagic stroke monitoring                               |
| 48149   | G681.00  | Sequelae of intracerebral haemorrhage                        |
| 43451   | G682.00  | Sequelae of other nontraumatic intracranial haemorrhage      |
| 5051    | G61..00  | Intracerebral haemorrhage                                    |
| 6960    | G61..11  | CVA - cerebrovascular accid due to intracerebral haemorrhage |
| 18604   | G61..12  | Stroke due to intracerebral haemorrhage                      |
| 31595   | G610.00  | Cortical haemorrhage                                         |
| 40338   | G611.00  | Internal capsule haemorrhage                                 |
| 46316   | G612.00  | Basal nucleus haemorrhage                                    |
| 13564   | G613.00  | Cerebellar haemorrhage                                       |
| 7912    | G614.00  | Pontine haemorrhage                                          |
| 30045   | G616.00  | External capsule haemorrhage                                 |
| 30202   | G617.00  | Intracerebral haemorrhage, intraventricular                  |
| 57315   | G618.00  | Intracerebral haemorrhage, multiple localized                |
| 107440  | G619.00  | Lobar cerebral haemorrhage                                   |
| 31060   | G61X.00  | Intracerebral haemorrhage in hemisphere, unspecified         |
| 28314   | G61X000  | Left sided intracerebral haemorrhage, unspecified            |
| 19201   | G61X100  | Right sided intracerebral haemorrhage, unspecified           |
| 3535    | G61z.00  | Intracerebral haemorrhage NOS                                |
| 53810   | Gyu6200  | [X]Other intracerebral haemorrhage                           |
| 96630   | Gyu6F00  | [X]Intracerebral haemorrhage in hemisphere, unspecified      |
| 56007   | G601.00  | Subarachnoid haemorrhage from carotid siphon and bifurcation |
| 19412   | G602.00  | Subarachnoid haemorrhage from middle cerebral artery         |
| 17326   | G60X.00  | Subarachnoid haemorrh from intracranial artery, unspecif     |
| 108668  | Gyu6000  | [X]Subarachnoid haemorrhage from other intracranial arteries |
| 108630  | Gyu6E00  | [X]Subarachnoid haemorrh from intracranial artery, unspecif  |
| 31805   | G62..00  | Other and unspecified intracranial haemorrhage               |

|        |         |                                                              |
|--------|---------|--------------------------------------------------------------|
| 20284  | G62z.00 | Intracranial haemorrhage NOS                                 |
| 35916  | 7A20300 | Endarterectomy and patch repair of carotid artery            |
| 12733  | 7A20311 | Carotid endarterectomy and patch                             |
| 2654   | 7A20400 | Endarterectomy of carotid artery NEC                         |
| 93134  | 7A20500 | High-flow inter extrac intrac byp ext carot art mid cer art  |
| 89365  | 7A20600 | Byp carot art anastom superfic tempor artery middle cere art |
| 91775  | 7A20700 | Intracranial bypass from carotid artery NEC                  |
| 29973  | 7A22000 | Percutaneous transluminal angioplasty of carotid artery      |
| 47580  | 7A22300 | Percutaneous transluminal insertion stent carotid artery     |
| 93770  | 7A25600 | Percutaneous transluminal insertion of stent cerebral artery |
| 68906  | 7A26C00 | Endarterectomy of vertebral artery NEC                       |
| 55074  | 7A28200 | Percutaneous transluminal angioplasty of vertebral artery    |
| 68905  | 7A28500 | Percutaneous transluminal embolectomy of vertebral artery    |
| 41577  | 1477    | H/O: cerebrovascular disease                                 |
| 2418   | G6...00 | Cerebrovascular disease                                      |
| 45781  | G63..00 | Precerebral arterial occlusion                               |
| 63830  | G63..12 | Stenosis of precerebral arteries                             |
| 32447  | G630.00 | Basilar artery occlusion                                     |
| 4240   | G631.00 | Carotid artery occlusion                                     |
| 2156   | G631.11 | Stenosis, carotid artery                                     |
| 4152   | G631.12 | Thrombosis, carotid artery                                   |
| 40847  | G632.00 | Vertebral artery occlusion                                   |
| 98642  | G633.00 | Multiple and bilateral precerebral arterial occlusion        |
| 2652   | G634.00 | Carotid artery stenosis                                      |
| 51326  | G63y.00 | Other precerebral artery occlusion                           |
| 71585  | G63z.00 | Precerebral artery occlusion NOS                             |
| 8837   | G64..00 | Cerebral arterial occlusion                                  |
| 16517  | G640.00 | Cerebral thrombosis                                          |
| 15019  | G641.00 | Cerebral embolism                                            |
| 34758  | G641.11 | Cerebral embolus                                             |
| 18689  | G660.00 | Middle cerebral artery syndrome                              |
| 19280  | G661.00 | Anterior cerebral artery syndrome                            |
| 19260  | G662.00 | Posterior cerebral artery syndrome                           |
| 13577  | G67..00 | Other cerebrovascular disease                                |
| 24385  | G671100 | Chronic cerebral ischaemia                                   |
| 12555  | G671z00 | Generalised ischaemic cerebrovascular disease NOS            |
| 31704  | G677.00 | Occlusion/stenosis cerebral arts not result cerebral infarct |
| 51759  | G677000 | Occlusion and stenosis of middle cerebral artery             |
| 57527  | G677100 | Occlusion and stenosis of anterior cerebral artery           |
| 65770  | G677200 | Occlusion and stenosis of posterior cerebral artery          |
| 55602  | G677300 | Occlusion and stenosis of cerebellar arteries                |
| 71274  | G677400 | Occlusion+stenosis of multiple and bilat cerebral arteries   |
| 34117  | G67y.00 | Other cerebrovascular disease OS                             |
| 37493  | G67z.00 | Other cerebrovascular disease NOS                            |
| 23361  | G68..00 | Late effects of cerebrovascular disease                      |
| 51138  | G68W.00 | Sequelae/other + unspecified cerebrovascular diseases        |
| 51311  | G6y..00 | Other specified cerebrovascular disease                      |
| 10062  | G6z..00 | Cerebrovascular disease NOS                                  |
| 37199  | G70y000 | Carotid artery atherosclerosis                               |
| 22677  | G70y011 | Carotid artery disease                                       |
| 73901  | Gyu6.00 | [X]Cerebrovascular diseases                                  |
| 109679 | 5C13.00 | Old cerebral infarction on imaging                           |
| 39403  | G683.00 | Sequelae of cerebral infarction                              |
| 57495  | G63..11 | Infarction - precerebral                                     |
| 23671  | G63y000 | Cerebral infarct due to thrombosis of precerebral arteries   |
| 24446  | G63y100 | Cerebral infarction due to embolism of precerebral arteries  |
| 5363   | G64..11 | CVA - cerebral artery occlusion                              |
| 569    | G64..12 | Infarction - cerebral                                        |
| 6155   | G64..13 | Stroke due to cerebral arterial occlusion                    |



|        |         |                                                              |
|--------|---------|--------------------------------------------------------------|
| 36717  | G640000 | Cerebral infarction due to thrombosis of cerebral arteries   |
| 27975  | G641000 | Cerebral infarction due to embolism of cerebral arteries     |
| 3149   | G64z.00 | Cerebral infarction NOS                                      |
| 15252  | G64z.11 | Brainstem infarction NOS                                     |
| 5602   | G64z.12 | Cerebellar infarction                                        |
| 25615  | G64z000 | Brainstem infarction                                         |
| 9985   | G64z200 | Left sided cerebral infarction                               |
| 10504  | G64z300 | Right sided cerebral infarction                              |
| 26424  | G64z400 | Infarction of basal ganglia                                  |
| 39344  | G676000 | Cereb infarct due cerebral venous thrombosis, nonpyogenic    |
| 40758  | G6W..00 | Cereb infarct due unsp occlus/stenos precerebr arteries      |
| 33543  | G6X..00 | Cerebrl infarctn due/unspcf occlusn or sten/cerebrl artr     |
| 91627  | Gyu6300 | [X]Cerebrl infarctn due/unspcf occlusn or sten/cerebrl artr  |
| 53745  | Gyu6400 | [X]Other cerebral infarction                                 |
| 90572  | Gyu6500 | [X]Occlusion and stenosis of other precerebral arteries      |
| 92036  | Gyu6600 | [X]Occlusion and stenosis of other cerebral arteries         |
| 94482  | Gyu6G00 | [X]Cereb infarct due unsp occlus/stenos precerebr arteries   |
| 34135  | 14A7.00 | H/O: CVA/stroke                                              |
| 6305   | 14A7.11 | H/O: CVA                                                     |
| 5871   | 14A7.12 | H/O: stroke                                                  |
| 66873  | 14AK.00 | H/O: Stroke in last year                                     |
| 100639 | 1M4..00 | Central post-stroke pain                                     |
| 107195 | 661M700 | Stroke self-management plan agreed                           |
| 109743 | 661N700 | Stroke self-management plan review                           |
| 105100 | 662M100 | Stroke 6 month review                                        |
| 7138   | ZV12512 | [V]Personal history of cerebrovascular accident (CVA)        |
| 104505 | 662M200 | Stroke initial post discharge review                         |
| 93459  | Fyu5600 | [X]Other lacunar syndromes                                   |
| 47642  | G64z100 | Wallenberg syndrome                                          |
| 5185   | G64z111 | Lateral medullary syndrome                                   |
| 1469   | G66..00 | Stroke and cerebrovascular accident unspecified              |
| 1298   | G66..11 | CVA unspecified                                              |
| 6253   | G66..12 | Stroke unspecified                                           |
| 6116   | G66..13 | CVA - Cerebrovascular accident unspecified                   |
| 8443   | G663.00 | Brain stem stroke syndrome                                   |
| 17322  | G664.00 | Cerebellar stroke syndrome                                   |
| 33499  | G665.00 | Pure motor lacunar syndrome                                  |
| 51767  | G666.00 | Pure sensory lacunar syndrome                                |
| 7780   | G667.00 | Left sided CVA                                               |
| 12833  | G668.00 | Right sided CVA                                              |
| 13567  | 14AB.00 | H/O: TIA                                                     |
| 101251 | ZV12D00 | [V]Personal history of transient ischaemic attack            |
| 100015 | 8CRB.00 | Transient ischaemic attack clinical management plan          |
| 63746  | Fyu5500 | [X]Other transnt cerebral ischaemic attacks+related syndroms |
| 504    | G65..00 | Transient cerebral ischaemia                                 |
| 1433   | G65..12 | Transient ischaemic attack                                   |
| 105738 | G657.00 | Carotid territory transient ischaemic attack                 |
| 19354  | G65y.00 | Other transient cerebral ischaemia                           |
| 1895   | G65z.00 | Transient cerebral ischaemia NOS                             |
| 15788  | G65zz00 | Transient cerebral ischaemia NOS                             |
| 44740  | G680.00 | Sequelae of subarachnoid haemorrhage                         |
| 10792  | 662M.00 | Stroke monitoring                                            |
| 40053  | G671.00 | Generalised ischaemic cerebrovascular disease NOS            |
| 238210 | 4309M   | MENINGEAL HAEMORRHAGE                                        |
| 99367  | Gyu6A00 | [X]Other cerebrovascular disorders in diseases CE            |
| 54744  | F11x200 | Cerebral degeneration due to cerebrovascular disease         |
| 225147 | G661.00 | Anterior cerebral artery syndrome                            |
| 25114  | E030400 | Acute confusional state, of cerebrovascular origin           |
| 65745  | Gyu6100 | [X]Other subarachnoid haemorrhage                            |

|                                                                          |                                                            |                                                              |
|--------------------------------------------------------------------------|------------------------------------------------------------|--------------------------------------------------------------|
| 29939                                                                    | G600.00                                                    | Ruptured berry aneurysm                                      |
| 306476                                                                   | 4389                                                       | CEREBROVASCULAR DISEASE                                      |
| 5268                                                                     | G650.11                                                    | Insufficiency - basilar artery                               |
| 70536                                                                    | G671000                                                    | Acute cerebrovascular insufficiency NOS                      |
| 225202                                                                   | Gyu6700                                                    | [X]Other specified cerebrovascular diseases                  |
| 10794                                                                    | G656.00                                                    | Vertebrobasilar insufficiency                                |
| 33377                                                                    | G651.00                                                    | Vertebral artery syndrome                                    |
| 24035                                                                    | E031400                                                    | Subacute confusional state, of cerebrovascular origin        |
| 1786                                                                     | G60..00                                                    | Subarachnoid haemorrhage                                     |
| 265818                                                                   | 4319CR                                                     | HAEMORRHAGE INTRACRANIAL                                     |
| 41910                                                                    | G605.00                                                    | Subarachnoid haemorrhage from basilar artery                 |
| 105520                                                                   | 8Hd6.00                                                    | Admission to stroke unit                                     |
| 16507                                                                    | G65z100                                                    | Intermittent cerebral ischaemia                              |
| 50594                                                                    | G654.00                                                    | Multiple and bilateral precerebral artery syndromes          |
| 60781                                                                    | P7y0z00                                                    | Cerebrovascular system anomaly NOS                           |
| 303847                                                                   | 4369B                                                      | STROKE                                                       |
| 306468                                                                   | 4319CE                                                     | HAEMORRHAGE INTRACEREBRAL                                    |
| 247398                                                                   | 4380                                                       | CEREBROVASCULAR DISEASE WITH HYPERTENSIO                     |
| 62342                                                                    | G615.00                                                    | Bulbar haemorrhage                                           |
| 9696                                                                     | G604.00                                                    | Subarachnoid haemorrhage from posterior communicating artery |
| 60692                                                                    | G606.00                                                    | Subarachnoid haemorrhage from vertebral artery               |
| 94105                                                                    | P7y0y00                                                    | Other specified cerebrovascular anomaly                      |
| 42331                                                                    | G603.00                                                    | Subarachnoid haemorrhage from anterior communicating artery  |
| 303829                                                                   | 4309                                                       | SUBARACHNOID HAEMORRHAGE                                     |
| 23942                                                                    | G650.00                                                    | Basilar artery syndrome                                      |
| 284069                                                                   | 4310                                                       | HAEMORRHAGE INTRACEREBRAL WITH HYPERTENS                     |
| 256592                                                                   | 4300                                                       | SUBARACHNOID HAEMORRHAGE WITH HYPERTENSI                     |
| 7017                                                                     | 7004300                                                    | Evacuation of intracerebral haematoma NEC                    |
| 276128                                                                   | 1477                                                       | H/O: cerebrovascular disease                                 |
| 303835                                                                   | 4350                                                       | TRANSIENT CEREBRAL ISCHAEMIA WITH HYPERT                     |
| 31451                                                                    | P7y0.00                                                    | Cerebrovascular system anomalies                             |
| 23580                                                                    | G60z.00                                                    | Subarachnoid haemorrhage NOS                                 |
| 95347                                                                    | Fyu5700                                                    | [X]Other vascular syndroms/brain in cerebrovasculr diseases  |
| 2417                                                                     | G65..13                                                    | Vertebro-basilar insufficiency                               |
| 13707                                                                    | 8HBJ.00                                                    | Stroke / transient ischaemic attack referral                 |
| 52246                                                                    | 13YA.00                                                    | Stroke group member                                          |
| 21118                                                                    | G651000                                                    | Vertebro-basilar artery syndrome                             |
| 234331                                                                   | Gyu6D00                                                    | [X]Sequelae/other unspecified cerebrovascular diseases       |
| 44765                                                                    | G653.00                                                    | Carotid artery syndrome hemispheric                          |
| <b>ICD-10 code</b>                                                       |                                                            |                                                              |
| G45 (0,1,2,3,4,8,9)                                                      | Transient cerebral ischaemic attacks and related syndromes |                                                              |
| I60 (0,1,2,3,4,5,6,7,8,9)                                                | Subarachnoid hemorrhage                                    |                                                              |
| I61 (0,1,2,3,4,5,6,8,9)                                                  | Intracerebral hemorrhage                                   |                                                              |
| I63 (0,1,2,3,4,5,6,8,9)                                                  | Cerebral infarction                                        |                                                              |
| I64                                                                      | Stroke, not specified as haemorrhage or infarction         |                                                              |
| <b>Acute Myocardial Infarction (used to define cardiovascular event)</b> |                                                            |                                                              |
| <b>Medcode</b>                                                           | <b>Readcode</b>                                            | <b>Readterm</b>                                              |
| 241                                                                      | G30..00                                                    | Acute myocardial infarction                                  |
| 1204                                                                     | G30..14                                                    | Heart attack                                                 |
| 1677                                                                     | G30..15                                                    | MI - acute myocardial infarction                             |
| 1678                                                                     | G308.00                                                    | Inferior myocardial infarction NOS                           |
| 2491                                                                     | G30..12                                                    | Coronary thrombosis                                          |
| 3704                                                                     | G307.00                                                    | Acute subendocardial infarction                              |
| 5387                                                                     | G301.00                                                    | Other specified anterior myocardial infarction               |
| 8935                                                                     | G302.00                                                    | Acute inferolateral infarction                               |
| 9276                                                                     | G31y000                                                    | Acute coronary insufficiency                                 |
| 9507                                                                     | G307000                                                    | Acute non-Q wave infarction                                  |
| 10562                                                                    | G307100                                                    | Acute non-ST segment elevation myocardial infarction         |

|        |          |                                                               |
|--------|----------|---------------------------------------------------------------|
| 11983  | G311500  | Acute coronary syndrome                                       |
| 12139  | G300.00  | Acute anterolateral infarction                                |
| 12229  | G30X000  | Acute ST segment elevation myocardial infarction              |
| 13566  | G30..11  | Attack - heart                                                |
| 13571  | G30..16  | Thrombosis - coronary                                         |
| 14658  | G30z.00  | Acute myocardial infarction NOS                               |
| 14897  | G301z00  | Anterior myocardial infarction NOS                            |
| 14898  | G305.00  | Lateral myocardial infarction NOS                             |
| 17689  | G30..17  | Silent myocardial infarction                                  |
| 17872  | G301100  | Acute anteroseptal infarction                                 |
| 18842  | G35..00  | Subsequent myocardial infarction                              |
| 23708  | G361.00  | Atrial septal defect/curr comp folow acut myocardal infarct   |
| 23892  | G304.00  | Posterior myocardial infarction NOS                           |
| 24126  | G360.00  | Haemopericardium/current comp folow acut myocard infarct      |
| 27951  | G31..00  | Other acute and subacute ischaemic heart disease              |
| 27977  | G31yz00  | Other acute and subacute ischaemic heart disease NOS          |
| 28736  | G30y000  | Acute atrial infarction                                       |
| 29421  | G344.00  | Silent myocardial ischaemia                                   |
| 29553  | G366.00  | Thrombosis atrium,auric append&vent/curr comp foll acute MI   |
| 29643  | G303.00  | Acute inferoposterior infarction                              |
| 29758  | G30X.00  | Acute transmural myocardial infarction of unspecif site       |
| 30330  | G309.00  | Acute Q-wave infarct                                          |
| 30421  | G30..13  | Cardiac rupture following myocardial infarction (MI)          |
| 32272  | G38..00  | Postoperative myocardial infarction                           |
| 32854  | G30B.00  | Acute posterolateral myocardial infarction                    |
| 34803  | G30y.00  | Other acute myocardial infarction                             |
| 36423  | G36..00  | Certain current complication follow acute myocardial infarct  |
| 36523  | G311.00  | Preinfarction syndrome                                        |
| 37657  | G362.00  | Ventric septal defect/curr comp fol acut myocardal infarctn   |
| 38609  | G351.00  | Subsequent myocardial infarction of inferior wall             |
| 39693  | G31y200  | Subendocardial ischaemia                                      |
| 40429  | G301000  | Acute anteroapical infarction                                 |
| 41221  | G30y200  | Acute septal infarction                                       |
| 41835  | G384.00  | Postoperative subendocardial myocardial infarction            |
| 45809  | G350.00  | Subsequent myocardial infarction of anterior wall             |
| 46017  | G30yz00  | Other acute myocardial infarction NOS                         |
| 46112  | G380.00  | Postoperative transmural myocardial infarction anterior wall  |
| 46166  | G35X.00  | Subsequent myocardial infarction of unspecified site          |
| 46276  | G381.00  | Postoperative transmural myocardial infarction inferior wall  |
| 54251  | G311z00  | Preinfarction syndrome NOS                                    |
| 59189  | G363.00  | Ruptur cardiac wall w/out haemopericard/cur comp fol ac MI    |
| 59940  | G364.00  | Ruptur chordae tendinae/curr comp fol acute myocard infarct   |
| 61670  | 889A.00  | Diab mellit insulin-glucose infus acute myocardial infarct    |
| 62626  | G30y100  | Acute papillary muscle infarction                             |
| 63467  | G306.00  | True posterior myocardial infarction                          |
| 68357  | G31y100  | Microinfarction of heart                                      |
| 68748  | G38z.00  | Postoperative myocardial infarction, unspecified              |
| 69474  | G365.00  | Rupture papillary muscle/curr comp fol acute myocard infarct  |
| 72562  | G353.00  | Subsequent myocardial infarction of other sites               |
| 95550  | 8H2V.00  | Admit ischaemic heart disease emergency                       |
| 96838  | Gyu3400  | [X]Acute transmural myocardial infarction of unspecif site    |
| 99991  | Gyu3600  | [X]Subsequent myocardial infarction of unspecified site       |
| 106812 | G383.00  | Postoperative transmural myocardial infarction unspec site    |
| 109035 | Gyu3500  | [X]Subsequent myocardial infarction of other sites            |
| 35119  | G501.00  | Post infarction pericarditis                                  |
| 40996  | 7929111  | Percut translum coronary thrombolytic therapy - streptokinase |
| 33650  | 7929100  | Percut transluminal coronary thrombolysis with streptokinase  |
| 107406 | 7.92E+02 | Emergency percutaneous coronary intervention                  |
| 94504  | 8B3a.00  | Door to needle time                                           |

|                                                     |                 |                                                                |
|-----------------------------------------------------|-----------------|----------------------------------------------------------------|
| 70440                                               | 8B3g.00         | Pain to thrombolysis time                                      |
| <b>ICD-10 code</b>                                  |                 |                                                                |
| I21 (0,1,2,3,4,9)                                   |                 | Acute myocardial infarction                                    |
| I22 (0,1,2,8,9)                                     |                 | Subsequent myocardial infarction                               |
| I23 (0,1,2,3,4,5,6,8)                               |                 | Certain current complications following AMI                    |
| <b>ICD-9 code</b>                                   |                 |                                                                |
| 410                                                 |                 | Acute myocardial infarction                                    |
| 411                                                 |                 | Postmyocardial infarction syndrome                             |
| <b>Stroke (used to define cardiovascular event)</b> |                 |                                                                |
| <b>Medcode</b>                                      | <b>Readcode</b> | <b>Readterm</b>                                                |
| 569                                                 | G64..12         | Infarction - cerebral                                          |
| 1298                                                | G66..11         | CVA unspecified                                                |
| 1469                                                | G66..00         | Stroke and cerebrovascular accident unspecified                |
| 1786                                                | g60..00         | 1 Subarachnoid haemorrhage                                     |
| 3149                                                | G64z.00         | Cerebral infarction NOS                                        |
| 3535                                                | G61z.00         | Intracerebral haemorrhage NOS                                  |
| 4152                                                | g631.12         | 1 Thrombosis, carotid artery                                   |
| 4240                                                | G631.00         | Carotid artery occlusion                                       |
| 5051                                                | G61..00         | Intracerebral haemorrhage                                      |
| 5185                                                | G64z111         | Lateral medullary syndrome                                     |
| 5363                                                | G64..11         | CVA - cerebral artery occlusion                                |
| 5602                                                | G64z.12         | Cerebellar infarction                                          |
| 6116                                                | G66..13         | CVA - Cerebrovascular accident unspecified                     |
| 6155                                                | G64..13         | Stroke due to cerebral arterial occlusion                      |
| 6253                                                | G66..12         | Stroke unspecified                                             |
| 6960                                                | G61..11         | CVA - cerebrovascular accid due to intracerebral haemorrhage   |
| 7780                                                | G667.00         | Left sided CVA                                                 |
| 7912                                                | G614.00         | Pontine haemorrhage                                            |
| 8443                                                | G663.00         | Brain stem stroke syndrome                                     |
| 8837                                                | G64..00         | Cerebral arterial occlusion                                    |
| 9696                                                | g604.00         | 1 Subarachnoid haemorrhage from posterior communicating artery |
| 9985                                                | G64z200         | Left sided cerebral infarction                                 |
| 10504                                               | G64z300         | Right sided cerebral infarction                                |
| 12833                                               | G668.00         | Right sided CVA                                                |
| 13564                                               | G613.00         | Cerebellar haemorrhage                                         |
| 15019                                               | G641.00         | Cerebral embolism                                              |
| 15252                                               | G64z.11         | Brainstem infarction NOS                                       |
| 16517                                               | G640.00         | Cerebral thrombosis                                            |
| 16956                                               | G669.00         | Cerebral palsy, not congenital or infantile, acute             |
| 17322                                               | G664.00         | Cerebellar stroke syndrome                                     |
| 17326                                               | g60x.00         | 1 Subarachnoid haemorrh from intracranial artery, unspecif     |
| 18604                                               | G61..12         | Stroke due to intracerebral haemorrhage                        |
| 18689                                               | G660.00         | Middle cerebral artery syndrome                                |
| 19201                                               | G61X100         | Right sided intracerebral haemorrhage, unspecified             |
| 19260                                               | G662.00         | Posterior cerebral artery syndrome                             |
| 19280                                               | G661.00         | Anterior cerebral artery syndrome                              |
| 19412                                               | g602.00         | 1 Subarachnoid haemorrhage from middle cerebral artery         |
| 20284                                               | g62z.00         | 1 Intracranial haemorrhage NOS                                 |
| 23580                                               | g60z.00         | 1 Subarachnoid haemorrhage NOS                                 |
| 23671                                               | G63y000         | Cerebral infarct due to thrombosis of precerebral arteries     |
| 24446                                               | G63y100         | Cerebral infarction due to embolism of precerebral arteries    |
| 25615                                               | G64z000         | Brainstem infarction                                           |
| 26424                                               | G64z400         | Infarction of basal ganglia                                    |
| 27975                                               | G641000         | Cerebral infarction due to embolism of cerebral arteries       |
| 28314                                               | G61X000         | Left sided intracerebral haemorrhage, unspecified              |
| 29939                                               | g600.00         | 1 Ruptured berry aneurysm                                      |
| 30045                                               | G616.00         | External capsule haemorrhage                                   |
| 30202                                               | G617.00         | Intracerebral haemorrhage, intraventricular                    |

|                          |         |                                                              |
|--------------------------|---------|--------------------------------------------------------------|
| 31060                    | G61X.00 | Intracerebral haemorrhage in hemisphere, unspecified         |
| 31595                    | G610.00 | Cortical haemorrhage                                         |
| 31704                    | G677.00 | Occlusion/stenosis cerebral arts not result cerebral infarct |
| 31805                    | g62..00 | 1 Other and unspecified intracranial haemorrhage             |
| 33499                    | G665.00 | Pure motor lacunar syndrome                                  |
| 33543                    | G6X..00 | Cerebrl infarctn due/unspcf occlusn or sten/cerebrl artr     |
| 34758                    | G641.11 | Cerebral embolus                                             |
| 36717                    | G640000 | Cerebral infarction due to thrombosis of cerebral arteries   |
| 39344                    | G676000 | Cereb infarct due cerebral venous thrombosis, nonpyogenic    |
| 40338                    | G611.00 | Internal capsule haemorrhage                                 |
| 40758                    | G6W..00 | Cereb infarct due unsp occlus/stenos precerebr arteries      |
| 41910                    | G605.00 | Subarachnoid haemorrhage from basilar artery                 |
| 42331                    | G603.00 | Subarachnoid haemorrhage from anterior communicating artery  |
| 44765                    | G653.00 | Carotid artery syndrome hemispheric                          |
| 46316                    | G612.00 | Basal nucleus haemorrhage                                    |
| 47642                    | G64z100 | Wallenberg syndrome                                          |
| 50594                    | G654.00 | Multiple and bilateral precerebral artery syndromes          |
| 51759                    | G677000 | Occlusion and stenosis of middle cerebral artery             |
| 51767                    | G666.00 | Pure sensory lacunar syndrome                                |
| 53745                    | Gyu6400 | [X]Other cerebral infarction                                 |
| 53755                    | Fyu9.00 | [X]Cerebral palsy and other paralytic syndromes              |
| 53810                    | Gyu6200 | [X]Other intracerebral haemorrhage                           |
| 55602                    | G677300 | Occlusion and stenosis of cerebellar arteries                |
| 56007                    | G601.00 | Subarachnoid haemorrhage from carotid siphon and bifurcation |
| 57315                    | G618.00 | Intracerebral haemorrhage, multiple localized                |
| 57495                    | G63..11 | Infarction - precerebral                                     |
| 57527                    | G677100 | Occlusion and stenosis of anterior cerebral artery           |
| 60692                    | G606.00 | Subarachnoid haemorrhage from vertebral artery               |
| 62342                    | G615.00 | Bulbar haemorrhage                                           |
| 65745                    | Gyu6100 | [X]Other subarachnoid haemorrhage                            |
| 65770                    | G677200 | Occlusion and stenosis of posterior cerebral artery          |
| 71274                    | G677400 | Occlusion+stenosis of multiple and bilat cerebral arteries   |
| 71585                    | G63z.00 | Precerebral artery occlusion NOS                             |
| 90572                    | Gyu6500 | [X]Occlusion and stenosis of other precerebral arteries      |
| 91627                    | Gyu6300 | [X]Cerebrl infarctn due/unspcf occlusn or sten/cerebrl artr  |
| 92036                    | Gyu6600 | [X]Occlusion and stenosis of other cerebral arteries         |
| 94482                    | Gyu6G00 | [X]Cereb infarct due unsp occlus/stenos precerebr arteries   |
| 96630                    | Gyu6F00 | [X]Intracerebral haemorrhage in hemisphere, unspecified      |
| 98642                    | G633.00 | Multiple and bilateral precerebral arterial occlusion        |
| 101733                   | G67A.00 | Cerebral vein thrombosis                                     |
| 107440                   | G619.00 | Lobar cerebral haemorrhage                                   |
| 108630                   | Gyu6E00 | [X]Subarachnoid haemorrh from intracranial artery, unspecif  |
| 108668                   | Gyu6000 | [X]Subarachnoid haemorrhage from other intracranial arteries |
| 2418                     | G6...00 | Cerebrovascular disease                                      |
| <b>ICD-10 code</b>       |         |                                                              |
| 60 (0,1,2,3,4,5,6,7,8,9) |         | Subarachnoid hemorrhage                                      |
| I61 (0,1,2,3,4,5,6,8,9)  |         | Intracerebral hemorrhage                                     |
| I63 (0,1,2,3,4,5,6,8,9)  |         | Cerebral infarction                                          |
| I64                      |         | Stroke, not specified as haemorrhage or infarction           |
| <b>ICD-9 code</b>        |         |                                                              |
| 430                      |         | Subarachnoid haemorrhage                                     |
| 431                      |         | Intracerebral haemorrhage                                    |
| 432                      |         | Other and unspecified intracranial haemorrhage               |
| 433                      |         | Occlusion and stenosis of precerebral arteries               |
| 434                      |         | Occlusion of cerebral arteries                               |
| 436                      |         | Acute, but ill-defined, cerebrovascular disease              |
| 437                      |         | Other and ill-defined cerebrovascular disease                |
| <b>Gout</b>              |         |                                                              |

| <b>Medcode</b>     | <b>Readcode</b> | <b>Readterm</b>                          |
|--------------------|-----------------|------------------------------------------|
| 709                | C34..00         | Gout                                     |
| 2857               | N023.00         | Gouty arthritis                          |
| 3759               | 1443.00         | H/O: gout                                |
| 4440               | C34y200         | Gouty tophi of other sites               |
| 9874               | C34y500         | Gouty tophi of hand                      |
| 10080              | C340.00         | Gouty arthropathy                        |
| 11462              | C342.00         | Idiopathic gout                          |
| 12594              | N023z00         | Gouty arthritis NOS                      |
| 14996              | 6691.00         | Initial gout assessment                  |
| 16475              | 669..00         | Gout monitoring                          |
| 17284              | 2D52.00         | O/E - auricle of ear - tophi             |
| 21687              | C345.00         | Gout due to impairment of renal function |
| 24153              | C34z.00         | Gout NOS                                 |
| 27521              | C34yz00         | Other specified gouty manifestation NOS  |
| 28999              | C34y.00         | Other specified gouty manifestation      |
| 29658              | 6693.00         | Joints gout affected                     |
| 34006              | 6695.00         | Date gout treatment started              |
| 34105              | 6699.00         | Gout treatment changed                   |
| 35660              | 6692.00         | Follow-up gout assessment                |
| 35664              | N023700         | Gouty arthritis of the ankle and foot    |
| 36481              | C34y000         | Gouty tophi of ear                       |
| 43646              | 669A.00         | Date gout treatment stopped              |
| 44566              | C344.00         | Drug-induced gout                        |
| 45465              | N023300         | Gouty arthritis of the forearm           |
| 49775              | N023600         | Gouty arthritis of the lower leg         |
| 50067              | C34y300         | Gouty iritis                             |
| 52101              | N023400         | Gouty arthritis of the hand              |
| 52103              | 6698.00         | Gout drug side effects                   |
| 52117              | 669Z.00         | Gout monitoring NOS                      |
| 52969              | C341.00         | Gouty nephropathy                        |
| 57334              | G557300         | Gouty tophi of heart                     |
| 58064              | N023x00         | Gouty arthritis of multiple sites        |
| 58746              | 6697.00         | Gout associated problems                 |
| 59344              | C34y400         | Gouty neuritis                           |
| 60541              | N023y00         | Gouty arthritis of other specified site  |
| 61145              | C341z00         | Gouty nephropathy NOS                    |
| 68209              | 6696.00         | Date of last gout attack                 |
| 72471              | N023100         | Gouty arthritis of the shoulder region   |
| 93677              | N023800         | Gouty arthritis of toe                   |
| 93689              | C34y100         | Gouty tophi of heart                     |
| 94539              | Nyu1700         | [X]Other secondary gout                  |
| 97539              | N023200         | Gouty arthritis of the upper arm         |
| 108901             | C346.00         | Acute exacerbation of gout               |
| 111834             | C343.00         | Lead-induced gout                        |
| 113314             | N023000         | Gouty arthritis of unspecified site      |
| 114211             | C341000         | Gout nephropathy unspecified             |
| <b>ICD-10 code</b> |                 |                                          |
| M10                |                 | Gout                                     |
| <b>Gout flare</b>  |                 |                                          |
| <b>Medcode</b>     | <b>Readcode</b> | <b>Readterm</b>                          |
| 45465              | N023300         | Gouty arthritis of the forearm           |
| 12594              | N023z00         | Gouty arthritis NOS                      |
| 97539              | N023200         | Gouty arthritis of the upper arm         |
| 2857               | N023.00         | Gouty arthritis                          |
| 93677              | N023800         | Gouty arthritis of toe                   |
| 60541              | N023y00         | Gouty arthritis of other specified site  |

|                            |                 |                                                          |
|----------------------------|-----------------|----------------------------------------------------------|
| 52101                      | N023400         | Gouty arthritis of the hand                              |
| 58064                      | N023x00         | Gouty arthritis of multiple sites                        |
| 108901                     | C346.00         | Acute exacerbation of gout                               |
| 35664                      | N023700         | Gouty arthritis of the ankle and foot                    |
| 49775                      | N023600         | Gouty arthritis of the lower leg                         |
| 72471                      | N023100         | Gouty arthritis of the shoulder region                   |
| 113314                     | N023000         | Gouty arthritis of unspecified site                      |
| <b>ICD-10 code</b>         |                 |                                                          |
| M10                        |                 | Gout                                                     |
| <b>Atrial fibrillation</b> |                 |                                                          |
| <b>Medcode</b>             | <b>Readcode</b> | <b>Readterm</b>                                          |
| 2212                       | G573.00         | Atrial fibrillation and flutter                          |
| 1268                       | G573200         | Paroxysmal atrial fibrillation                           |
| 6345                       | 14AN.00         | H/O: atrial fibrillation                                 |
| 96277                      | G573400         | Permanent atrial fibrillation                            |
| 18746                      | 662S.00         | Atrial fibrillation monitoring                           |
| 1664                       | G573000         | Atrial fibrillation                                      |
| 23437                      | G573z00         | Atrial fibrillation and flutter NOS                      |
| 45773                      | 6A9..00         | Atrial fibrillation annual review                        |
| 90187                      | 90s0.00         | Atrial fibrillation monitoring first letter              |
| 105554                     | 8CMW200         | Atrial fibrillation care pathway                         |
| 96076                      | G573500         | Persistent atrial fibrillation                           |
| 35127                      | G573300         | Non-rheumatic atrial fibrillation                        |
| 9479                       | 936A00          | Implant intravenous pacemaker for atrial fibrillation    |
| <b>ICD-10 code</b>         |                 |                                                          |
| I48.0                      |                 | Paroxysmal atrial fibrillation                           |
| I48.1                      |                 | Persistent atrial fibrillation                           |
| I48.2                      |                 | Chronic atrial fibrillation                              |
| <b>Dyslipidaemia</b>       |                 |                                                          |
| <b>Medcode</b>             | <b>Readcode</b> | <b>Readterm</b>                                          |
| 339                        | C320.00         | Pure hypercholesterolaemia                               |
| 637                        | C324.00         | Hyperlipidaemia NOS                                      |
| 2091                       | 9N0J.00         | Seen in cholesterol clinic                               |
| 2493                       | 44P3.00         | Serum cholesterol raised                                 |
| 3386                       | C320000         | Familial hypercholesterolaemia                           |
| 3484                       | C320.11         | Familial hypercholesterolaemia                           |
| 5791                       | C322.00         | Mixed hyperlipidaemia                                    |
| 7447                       | C320z00         | Pure hypercholesterolaemia NOS                           |
| 12111                      | 8BL1.00         | Patient on maximal tolerated lipid lowering therapy      |
| 16085                      | 1442            | H/O: raised blood lipids                                 |
| 16937                      | 8B28.00         | Lipid lowering therapy                                   |
| 34224                      | C320300         | Low-density-lipoprotein-type (LDL) hyperlipoproteinaemia |
| 35720                      | 44P4.00         | Serum cholesterol very high                              |
| 52992                      | C322.11         | Fredrickson type IIb lipidaemia                          |
| 53091                      | C320y00         | Other specified pure hypercholesterolaemia               |
| 54499                      | C321.11         | Fredrickson type IV lipidaemia                           |
| 55855                      | C320.12         | Fredrickson type IIa lipidaemia                          |
| 59095                      | C320.13         | Low density lipoproteinaemia                             |
| 59564                      | C322.12         | Fredrickson type III lipidaemia                          |
| 95952                      | C328.00         | Dyslipidaemia                                            |
| 99456                      | C321.12         | Very low density lipoprotinaemia                         |
| 107252                     | C329.00         | Hypercholesterolaemia                                    |
| 9936                       | 66X..00         | Lipid disorder monitoring                                |
| <b>ICD-10 code</b>         |                 |                                                          |
| I78.0                      |                 | Pure hypercholesterolaemia                               |
| I78.1                      |                 | Pure hyperglyceridaemia                                  |
| I78.2                      |                 | Mixed hyperlipidaemia                                    |
| I78.4                      |                 | Other hyperlipidaemia                                    |

|                     |                              |                                                              |
|---------------------|------------------------------|--------------------------------------------------------------|
| 178.5               | Hyperlipidaemia, unspecified |                                                              |
| <b>Hypertension</b> |                              |                                                              |
| <b>Medcode</b>      | <b>Readcode</b>              | <b>Readterm</b>                                              |
| 204                 | G2...00                      | Hypertensive disease                                         |
| 351                 | G20..11                      | High blood pressure                                          |
| 799                 | G20..00                      | Essential hypertension                                       |
| 1894                | G201.00                      | Benign essential hypertension                                |
| 2666                | 14A2.00                      | H/O: hypertension                                            |
| 3425                | 662O.00                      | On treatment for hypertension                                |
| 3712                | G20z.11                      | Hypertension NOS                                             |
| 4372                | G202.00                      | Systolic hypertension                                        |
| 4668                | G22..00                      | Hypertensive renal disease                                   |
| 7057                | G2z..00                      | Hypertensive disease NOS                                     |
| 7329                | G24..00                      | Secondary hypertension                                       |
| 8732                | G2...11                      | BP - hypertensive disease                                    |
| 8857                | G21z011                      | Cardiomegaly - hypertensive                                  |
| 10818               | G20z.00                      | Essential hypertension NOS                                   |
| 13188               | 662G.00                      | Hypertensive treatm.changed                                  |
| 15106               | G22z.00                      | Hypertensive renal disease NOS                               |
| 15377               | G200.00                      | Malignant essential hypertension                             |
| 16059               | G24z.00                      | Secondary hypertension NOS                                   |
| 16173               | G21zz00                      | Hypertensive heart disease NOS                               |
| 16292               | G21..00                      | Hypertensive heart disease                                   |
| 16565               | 6627                         | Good hypertension control                                    |
| 18590               | 662b.00                      | Moderate hypertension control                                |
| 18765               | G2y..00                      | Other specified hypertensive disease                         |
| 21826               | 662F.00                      | Hypertension treatm. started                                 |
| 21837               | G232.00                      | Hypertensive heart&renal dis wth (congestive) heart failure  |
| 22333               | 813N.00                      | Hypertension treatment refused                               |
| 24127               | 9OIA.11                      | Hypertension monitored                                       |
| 25371               | G241000                      | Secondary benign renovascular hypertension                   |
| 27511               | 6628                         | Poor hypertension control                                    |
| 29310               | G22z.11                      | Renal hypertension                                           |
| 31341               | G24z100                      | Hypertension secondary to drug                               |
| 31387               | G24z000                      | Secondary renovascular hypertension NOS                      |
| 31464               | G21z.00                      | Hypertensive heart disease NOS                               |
| 31755               | G240.00                      | Secondary malignant hypertension                             |
| 32423               | G222.00                      | Hypertensive renal disease with renal failure                |
| 34744               | G244.00                      | Hypertension secondary to endocrine disorders                |
| 39649               | G220.00                      | Malignant hypertensive renal disease                         |
| 42229               | G24zz00                      | Secondary hypertension NOS                                   |
| 43935               | G221.00                      | Benign hypertensive renal disease                            |
| 50157               | G210.00                      | Malignant hypertensive heart disease                         |
| 51635               | G241z00                      | Secondary benign hypertension NOS                            |
| 52127               | G211100                      | Benign hypertensive heart disease with CCF                   |
| 52427               | G211.00                      | Benign hypertensive heart disease                            |
| 57288               | G241.00                      | Secondary benign hypertension                                |
| 57987               | G234.00                      | Hyperten heart&renal dis+both(congestv)heart and renal fail  |
| 59383               | G240000                      | Secondary malignant renovascular hypertension                |
| 69753               | Gyu2.00                      | [X]Hypertensive diseases                                     |
| 73293               | G240z00                      | Secondary malignant hypertension NOS                         |
| 83473               | G203.00                      | Diastolic hypertension                                       |
| 95334               | G210000                      | Malignant hypertensive heart disease without CCF             |
| 97533               | Gyu2100                      | [X]Hypertension secondary to other renal disorders           |
| 105274              | G28..00                      | Stage 2 hypertension (NICE - Nat Ins for Hth Clin Excl 2011) |
| 105316              | G25..11                      | Stage 1 hypertension                                         |
| 105371              | G25..00                      | Stage 1 hypertension (NICE - Nat Ins for Hth Clin Excl 2011) |
| 105480              | G27..00                      | Hypertension resistant to drug therapy                       |
| 105487              | G26..11                      | Severe hypertension                                          |



|                          |                 |                                                            |
|--------------------------|-----------------|------------------------------------------------------------|
| 107704                   | G20..12         | Primary hypertension                                       |
| 4444                     | 662..12         | Hypertension monitoring                                    |
| 13186                    | 662P.00         | Hypertension monitoring                                    |
| 5215                     | 90I..00         | Hypertension monitoring admin.                             |
| <b>Diabetes mellitus</b> |                 |                                                            |
| <b>Medcode</b>           | <b>Readcode</b> | <b>Readterm</b>                                            |
| 506                      | C100112         | Non-insulin dependent diabetes mellitus                    |
| 711                      | C10..00         | Diabetes mellitus                                          |
| 758                      | C10F.00         | Type 2 diabetes mellitus                                   |
| 1038                     | C100011         | Insulin dependent diabetes mellitus                        |
| 1407                     | C10FJ00         | Insulin treated Type 2 diabetes mellitus                   |
| 1549                     | C10E.00         | Type 1 diabetes mellitus                                   |
| 1647                     | C108.00         | Insulin dependent diabetes mellitus                        |
| 1682                     | C101.00         | Diabetes mellitus with ketoacidosis                        |
| 1684                     | 66A4.00         | Diabetic on oral treatment                                 |
| 2378                     | 66AJ.00         | Diabetic - poor control                                    |
| 2471                     | K01x100         | Nephrotic syndrome in diabetes mellitus                    |
| 2475                     | C104.11         | Diabetic nephropathy                                       |
| 4513                     | C109.00         | Non-insulin dependent diabetes mellitus                    |
| 5884                     | C109.11         | NIDDM - Non-insulin dependent diabetes mellitus            |
| 6509                     | C108700         | Insulin dependent diabetes mellitus with retinopathy       |
| 6791                     | C108800         | Insulin dependent diabetes mellitus - poor control         |
| 7059                     | 8H2J.00         | Admit diabetic emergency                                   |
| 7795                     | C106.12         | Diabetes mellitus with neuropathy                          |
| 8403                     | C109700         | Non-insulin dependent diabetes mellitus - poor control     |
| 8842                     | 66A5.00         | Diabetic on insulin                                        |
| 9013                     | 66AJ.11         | Unstable diabetes                                          |
| 10098                    | C10yy00         | Other specified diabetes mellitus with other spec comps    |
| 10418                    | C10ED00         | Type 1 diabetes mellitus with nephropathy                  |
| 10692                    | C10EM00         | Type 1 diabetes mellitus with ketoacidosis                 |
| 11047                    | 66AH000         | Conversion to insulin                                      |
| 11471                    | 8B3I.00         | Diabetes medication review                                 |
| 11551                    | C10B.00         | Diabetes mellitus induced by steroids                      |
| 11848                    | C314.11         | Renal diabetes                                             |
| 12213                    | 8BL2.00         | Patient on maximal tolerated therapy for diabetes          |
| 12455                    | C10E.11         | Type I diabetes mellitus                                   |
| 12640                    | C10FC00         | Type 2 diabetes mellitus with nephropathy                  |
| 12736                    | C10F500         | Type 2 diabetes mellitus with gangrene                     |
| 13071                    | 66AI.00         | Diabetic - good control                                    |
| 13279                    | C104y00         | Other specified diabetes mellitus with renal complications |
| 14803                    | C100100         | Diabetes mellitus, adult onset, no mention of complication |
| 14889                    | C100111         | Maturity onset diabetes                                    |
| 15690                    | C103.00         | Diabetes mellitus with ketoacidotic coma                   |
| 16230                    | C106.00         | Diabetes mellitus with neurological manifestation          |
| 16490                    | 66AH.00         | Diabetic treatment changed                                 |
| 16491                    | C106.13         | Diabetes mellitus with polyneuropathy                      |
| 16502                    | C104.00         | Diabetes mellitus with renal manifestation                 |
| 17067                    | F171100         | Autonomic neuropathy due to diabetes                       |
| 17262                    | C109600         | Non-insulin-dependent diabetes mellitus with retinopathy   |
| 17545                    | C108F11         | Type I diabetes mellitus with diabetic cataract            |
| 17858                    | C108.12         | Type 1 diabetes mellitus                                   |
| 17859                    | C109.12         | Type 2 diabetes mellitus                                   |
| 18056                    | 2G5C.00         | Foot abnormality - diabetes related                        |
| 18143                    | C109G11         | Type II diabetes mellitus with arthropathy                 |
| 18209                    | C109012         | Type 2 diabetes mellitus with renal complications          |
| 18219                    | C109.13         | Type II diabetes mellitus                                  |
| 18230                    | C108J12         | Type 1 diabetes mellitus with neuropathic arthropathy      |

|       |         |                                                              |
|-------|---------|--------------------------------------------------------------|
| 18264 | C109J12 | Insulin treated Type II diabetes mellitus                    |
| 18278 | C109J00 | Insulin treated Type 2 diabetes mellitus                     |
| 18387 | C10E700 | Type 1 diabetes mellitus with retinopathy                    |
| 18390 | C10FM00 | Type 2 diabetes mellitus with persistent microalbuminuria    |
| 18425 | C10FB00 | Type 2 diabetes mellitus with polyneuropathy                 |
| 18496 | C10F600 | Type 2 diabetes mellitus with retinopathy                    |
| 18505 | C108.11 | IDDM-Insulin dependent diabetes mellitus                     |
| 18642 | C10EH00 | Type 1 diabetes mellitus with arthropathy                    |
| 18662 | 8HBH.00 | Diabetic retinopathy 6 month review                          |
| 18683 | C10E500 | Type 1 diabetes mellitus with ulcer                          |
| 18777 | C10F000 | Type 2 diabetes mellitus with renal complications            |
| 21482 | C102.00 | Diabetes mellitus with hyperosmolar coma                     |
| 21983 | C108012 | Type 1 diabetes mellitus with renal complications            |
| 22023 | 66AJz00 | Diabetic - poor control NOS                                  |
| 22487 | C10N.00 | Secondary diabetes mellitus                                  |
| 22573 | C106z00 | Diabetes mellitus NOS with neurological manifestation        |
| 22871 | C10EP00 | Type 1 diabetes mellitus with exudative maculopathy          |
| 22884 | C10F.11 | Type II diabetes mellitus                                    |
| 22967 | 2BBF.00 | Retinal abnormality - diabetes related                       |
| 24363 | 8A13.00 | Diabetic stabilisation                                       |
| 24423 | C108.13 | Type I diabetes mellitus                                     |
| 24458 | C109711 | Type II diabetes mellitus - poor control                     |
| 24490 | C100000 | Diabetes mellitus, juvenile type, no mention of complication |
| 24693 | C109G00 | Non-insulin dependent diabetes mellitus with arthropathy     |
| 24694 | C108B00 | Insulin dependent diabetes mellitus with mononeuropathy      |
| 24836 | C109C12 | Type 2 diabetes mellitus with nephropathy                    |
| 25591 | C10FQ00 | Type 2 diabetes mellitus with exudative maculopathy          |
| 25627 | C10F700 | Type 2 diabetes mellitus - poor control                      |
| 26054 | C10FL00 | Type 2 diabetes mellitus with persistent proteinuria         |
| 26855 | C108400 | Unstable insulin dependent diabetes mellitus                 |
| 28769 | 66AV.00 | Diabetic on insulin and oral treatment                       |
| 29041 | 66AN.00 | Date diabetic treatment start                                |
| 29979 | C109900 | Non-insulin-dependent diabetes mellitus without complication |
| 30294 | C10EL00 | Type 1 diabetes mellitus with persistent microalbuminuria    |
| 30323 | C10EK00 | Type 1 diabetes mellitus with persistent proteinuria         |
| 31310 | C108900 | Insulin dependent diabetes maturity onset                    |
| 31790 | F372.00 | Polyneuropathy in diabetes                                   |
| 32193 | C11y000 | Steroid induced diabetes                                     |
| 32403 | C107.11 | Diabetes mellitus with gangrene                              |
| 32556 | C107.12 | Diabetes with gangrene                                       |
| 32627 | C10FN00 | Type 2 diabetes mellitus with ketoacidosis                   |
| 33254 | C105.00 | Diabetes mellitus with ophthalmic manifestation              |
| 33343 | C10y.00 | Diabetes mellitus with other specified manifestation         |
| 33807 | C107200 | Diabetes mellitus, adult with gangrene                       |
| 33969 | C10A100 | Malnutrition-related diabetes mellitus with ketoacidosis     |
| 34268 | C10F200 | Type 2 diabetes mellitus with neurological complications     |
| 34283 | C105z00 | Diabetes mellitus NOS with ophthalmic manifestation          |
| 34450 | C10FK00 | Hyperosmolar non-ketotic state in type 2 diabetes mellitus   |
| 34912 | C109400 | Non-insulin dependent diabetes mellitus with ulcer           |
| 35105 | C104100 | Diabetes mellitus, adult onset, with renal manifestation     |
| 35107 | C104z00 | Diabetes mellitus with nephropathy NOS                       |
| 35288 | C10E800 | Type 1 diabetes mellitus - poor control                      |
| 35385 | C10FH00 | Type 2 diabetes mellitus with neuropathic arthropathy        |
| 35399 | C107.00 | Diabetes mellitus with peripheral circulatory disorder       |
| 36633 | C109K00 | Hyperosmolar non-ketotic state in type 2 diabetes mellitus   |
| 36695 | C10D.00 | Diabetes mellitus autosomal dominant type 2                  |
| 37648 | C109J11 | Insulin treated non-insulin dependent diabetes mellitus      |
| 37806 | C10FF00 | Type 2 diabetes mellitus with peripheral angiopathy          |
| 38161 | C108711 | Type I diabetes mellitus with retinopathy                    |

|       |         |                                                              |
|-------|---------|--------------------------------------------------------------|
| 38617 | C101y00 | Other specified diabetes mellitus with ketoacidosis          |
| 38986 | C100.00 | Diabetes mellitus with no mention of complication            |
| 39070 | C10EE00 | Type 1 diabetes mellitus with hypoglycaemic coma             |
| 39317 | C106100 | Diabetes mellitus, adult onset, + neurological manifestation |
| 39809 | C108J00 | Insulin dependent diab mell with neuropathic arthropathy     |
| 40023 | C102000 | Diabetes mellitus, juvenile type, with hyperosmolar coma     |
| 40401 | C109500 | Non-insulin dependent diabetes mellitus with gangrene        |
| 40682 | C10E900 | Type 1 diabetes mellitus maturity onset                      |
| 40837 | C10EN00 | Type 1 diabetes mellitus with ketoacidotic coma              |
| 40962 | C109H00 | Non-insulin dependent d m with neuropathic arthropathy       |
| 41049 | C108712 | Type 1 diabetes mellitus with retinopathy                    |
| 41389 | C105100 | Diabetes mellitus, adult onset, + ophthalmic manifestation   |
| 41686 | Cyu2000 | [X]Other specified diabetes mellitus                         |
| 41716 | C108C00 | Insulin dependent diabetes mellitus with polyneuropathy      |
| 42505 | C101z00 | Diabetes mellitus NOS with ketoacidosis                      |
| 42567 | C103000 | Diabetes mellitus, juvenile type, with ketoacidotic coma     |
| 42729 | C108E11 | Type I diabetes mellitus with hypoglycaemic coma             |
| 42762 | C109612 | Type 2 diabetes mellitus with retinopathy                    |
| 42831 | C10E200 | Type 1 diabetes mellitus with neurological complications     |
| 43139 | C102100 | Diabetes mellitus, adult onset, with hyperosmolar coma       |
| 43227 | C10F311 | Type II diabetes mellitus with multiple complications        |
| 43453 | C10C.00 | Diabetes mellitus autosomal dominant                         |
| 43785 | C109D00 | Non-insulin dependent diabetes mellitus with hypoglyca coma  |
| 43921 | C10E400 | Unstable type 1 diabetes mellitus                            |
| 44260 | C108F00 | Insulin dependent diabetes mellitus with diabetic cataract   |
| 44440 | C108E00 | Insulin dependent diabetes mellitus with hypoglycaemic coma  |
| 44443 | C108500 | Insulin dependent diabetes mellitus with ulcer               |
| 44779 | C109E12 | Type 2 diabetes mellitus with diabetic cataract              |
| 44982 | C10FE00 | Type 2 diabetes mellitus with diabetic cataract              |
| 45276 | C10E312 | Insulin dependent diabetes mellitus with multiple complicat  |
| 45467 | C109B00 | Non-insulin dependent diabetes mellitus with polyneuropathy  |
| 45491 | C10z.00 | Diabetes mellitus with unspecified complication              |
| 45913 | C109712 | Type 2 diabetes mellitus - poor control                      |
| 45914 | C108812 | Type 1 diabetes mellitus - poor control                      |
| 45919 | C109212 | Type 2 diabetes mellitus with neurological complications     |
| 46150 | C109512 | Type 2 diabetes mellitus with gangrene                       |
| 46290 | C108y00 | Other specified diabetes mellitus with multiple comps        |
| 46301 | C10EC00 | Type 1 diabetes mellitus with polyneuropathy                 |
| 46624 | C10C.11 | Maturity onset diabetes in youth                             |
| 46850 | C108811 | Type I diabetes mellitus - poor control                      |
| 46917 | C10FD00 | Type 2 diabetes mellitus with hypoglycaemic coma             |
| 46963 | C108000 | Insulin-dependent diabetes mellitus with renal complications |
| 47315 | C10F711 | Type II diabetes mellitus - poor control                     |
| 47321 | C10F100 | Type 2 diabetes mellitus with ophthalmic complications       |
| 47341 | 8A12.00 | Diabetic crisis monitoring                                   |
| 47377 | C105y00 | Other specified diabetes mellitus with ophthalmic complicatn |
| 47409 | C109B11 | Type II diabetes mellitus with polyneuropathy                |
| 47582 | C10E000 | Type 1 diabetes mellitus with renal complications            |
| 47649 | C10E100 | Type 1 diabetes mellitus with ophthalmic complications       |
| 47650 | C10E300 | Type 1 diabetes mellitus with multiple complications         |
| 47816 | C109H11 | Type II diabetes mellitus with neuropathic arthropathy       |
| 47954 | C10F900 | Type 2 diabetes mellitus without complication                |
| 48192 | C109E11 | Type II diabetes mellitus with diabetic cataract             |
| 49074 | C10F400 | Type 2 diabetes mellitus with ulcer                          |
| 49146 | C108211 | Type I diabetes mellitus with neurological complications     |
| 49276 | C108100 | Insulin-dependent diabetes mellitus with ophthalmic comps    |
| 49554 | C10EF00 | Type 1 diabetes mellitus with diabetic cataract              |
| 49655 | C10F611 | Type II diabetes mellitus with retinopathy                   |
| 49869 | C109G12 | Type 2 diabetes mellitus with arthropathy                    |

|       |         |                                                              |
|-------|---------|--------------------------------------------------------------|
| 49949 | C10E411 | Unstable type I diabetes mellitus                            |
| 50225 | C109011 | Type II diabetes mellitus with renal complications           |
| 50429 | C109100 | Non-insulin-dependent diabetes mellitus with ophthalm comps  |
| 50527 | C10FB11 | Type II diabetes mellitus with polyneuropathy                |
| 50813 | C109A11 | Type II diabetes mellitus with mononeuropathy                |
| 50960 | L180500 | Pre-existing diabetes mellitus, insulin-dependent            |
| 50972 | C100z00 | Diabetes mellitus NOS with no mention of complication        |
| 51261 | C10E.12 | Insulin dependent diabetes mellitus                          |
| 51697 | C10G.00 | Secondary pancreatic diabetes mellitus                       |
| 51756 | C10FP00 | Type 2 diabetes mellitus with ketoacidotic coma              |
| 51957 | C108511 | Type I diabetes mellitus with ulcer                          |
| 52104 | C108300 | Insulin dependent diabetes mellitus with multiple complicatn |
| 52212 | Cyu2.00 | [X]Diabetes mellitus                                         |
| 52236 | C10A.00 | Malnutrition-related diabetes mellitus                       |
| 52283 | C108200 | Insulin-dependent diabetes mellitus with neurological comps  |
| 52303 | C109000 | Non-insulin-dependent diabetes mellitus with renal comps     |
| 53200 | C101000 | Diabetes mellitus, juvenile type, with ketoacidosis          |
| 53238 | 66AG.00 | Diabetic drug side effects                                   |
| 53392 | C10F911 | Type II diabetes mellitus without complication               |
| 54008 | C10EJ00 | Type 1 diabetes mellitus with neuropathic arthropathy        |
| 54212 | C109F00 | Non-insulin-dependent d m with peripheral angiopath          |
| 54600 | C10E412 | Unstable insulin dependent diabetes mellitus                 |
| 54856 | C101100 | Diabetes mellitus, adult onset, with ketoacidosis            |
| 54899 | C109F11 | Type II diabetes mellitus with peripheral angiopathy         |
| 55075 | C109411 | Type II diabetes mellitus with ulcer                         |
| 55239 | C10EQ00 | Type 1 diabetes mellitus with gastroparesis                  |
| 55842 | C109200 | Non-insulin-dependent diabetes mellitus with neuro comps     |
| 56268 | C109D11 | Type II diabetes mellitus with hypoglycaemic coma            |
| 56448 | C108A00 | Insulin-dependent diabetes without complication              |
| 56803 | C107400 | NIDDM with peripheral circulatory disorder                   |
| 57278 | C10F011 | Type II diabetes mellitus with renal complications           |
| 58604 | C109611 | Type II diabetes mellitus with retinopathy                   |
| 59253 | C10FG00 | Type 2 diabetes mellitus with arthropathy                    |
| 59288 | C103y00 | Other specified diabetes mellitus with coma                  |
| 59365 | C109C00 | Non-insulin dependent diabetes mellitus with nephropathy     |
| 59725 | C109111 | Type II diabetes mellitus with ophthalmic complications      |
| 59903 | C106.11 | Diabetic amyotrophy                                          |
| 59991 | C10D.11 | Maturity onset diabetes in youth type 2                      |
| 60107 | C108411 | Unstable type I diabetes mellitus                            |
| 60208 | C108J11 | Type I diabetes mellitus with neuropathic arthropathy        |
| 60499 | C108600 | Insulin dependent diabetes mellitus with gangrene            |
| 60699 | C109F12 | Type 2 diabetes mellitus with peripheral angiopathy          |
| 60796 | C10FL11 | Type II diabetes mellitus with persistent proteinuria        |
| 61021 | 68AB.00 | Diabetic digital retinopathy screening offered               |
| 61071 | C109D12 | Type 2 diabetes mellitus with hypoglycaemic coma             |
| 61122 | C10H.00 | Diabetes mellitus induced by non-steroid drugs               |
| 61344 | C108011 | Type I diabetes mellitus with renal complications            |
| 61470 | 66AI.00 | Diabetic monitoring - higher risk albumin excretion          |
| 61523 | C106y00 | Other specified diabetes mellitus with neurological comps    |
| 61670 | 889A.00 | Diab mellit insulin-glucose infus acute myocardial infarct   |
| 61829 | C108212 | Type 1 diabetes mellitus with neurological complications     |
| 62107 | C109511 | Type II diabetes mellitus with gangrene                      |
| 62146 | C109300 | Non-insulin-dependent diabetes mellitus with multiple comps  |
| 62209 | C10EM11 | Type I diabetes mellitus with ketoacidosis                   |
| 62352 | C108H11 | Type I diabetes mellitus with arthropathy                    |
| 62613 | C10EA11 | Type I diabetes mellitus without complication                |
| 62674 | C10FA00 | Type 2 diabetes mellitus with mononeuropathy                 |
| 63017 | C108911 | Type I diabetes mellitus maturity onset                      |
| 63357 | C107100 | Diabetes mellitus, adult, + peripheral circulatory disorder  |

|       |         |                                                              |
|-------|---------|--------------------------------------------------------------|
| 63371 | C10y100 | Diabetes mellitus, adult, + other specified manifestation    |
| 63690 | C10FR00 | Type 2 diabetes mellitus with gastroparesis                  |
| 63762 | C10z100 | Diabetes mellitus, adult onset, + unspecified complication   |
| 64283 | C10zy00 | Other specified diabetes mellitus with unspecified comps     |
| 64357 | C10zz00 | Diabetes mellitus NOS with unspecified complication          |
| 64446 | C108G00 | Insulin dependent diab mell with peripheral angiopathy       |
| 64449 | C108z00 | Unspecified diabetes mellitus with multiple complications    |
| 64571 | C109C11 | Type II diabetes mellitus with nephropathy                   |
| 64668 | C10FJ11 | Insulin treated Type II diabetes mellitus                    |
| 65025 | C107z00 | Diabetes mellitus NOS with peripheral circulatory disorder   |
| 65062 | C103z00 | Diabetes mellitus NOS with ketoacidotic coma                 |
| 65267 | C10F300 | Type 2 diabetes mellitus with multiple complications         |
| 65616 | C108H00 | Insulin dependent diabetes mellitus with arthropathy         |
| 65704 | C109412 | Type 2 diabetes mellitus with ulcer                          |
| 66145 | C10EN11 | Type I diabetes mellitus with ketoacidotic coma              |
| 66675 | C10A000 | Malnutrition-related diabetes mellitus with coma             |
| 66872 | C108D11 | Type I diabetes mellitus with nephropathy                    |
| 66965 | C109H12 | Type 2 diabetes mellitus with neuropathic arthropathy        |
| 67212 | C10H000 | DM induced by non-steroid drugs without complication         |
| 67853 | C106000 | Diabetes mellitus, juvenile, + neurological manifestation    |
| 67905 | C109211 | Type II diabetes mellitus with neurological complications    |
| 68105 | C10EB00 | Type 1 diabetes mellitus with mononeuropathy                 |
| 68390 | C108512 | Type 1 diabetes mellitus with ulcer                          |
| 68792 | C10z000 | Diabetes mellitus, juvenile type, + unspecified complication |
| 68843 | C103100 | Diabetes mellitus, adult onset, with ketoacidotic coma       |
| 69124 | C107300 | IDDM with peripheral circulatory disorder                    |
| 69278 | C109E00 | Non-insulin depend diabetes mellitus with diabetic cataract  |
| 69676 | C10EA00 | Type 1 diabetes mellitus without complication                |
| 69748 | C105000 | Diabetes mellitus, juvenile type, + ophthalmic manifestation |
| 69993 | C10E600 | Type 1 diabetes mellitus with gangrene                       |
| 70316 | C109112 | Type 2 diabetes mellitus with ophthalmic complications       |
| 70448 | C107000 | Diabetes mellitus, juvenile +peripheral circulatory disorder |
| 70766 | C108E12 | Type 1 diabetes mellitus with hypoglycaemic coma             |
| 70821 | C10yz00 | Diabetes mellitus NOS with other specified manifestation     |
| 72320 | C109A00 | Non-insulin dependent diabetes mellitus with mononeuropathy  |
| 72345 | C102z00 | Diabetes mellitus NOS with hyperosmolar coma                 |
| 72702 | C10E812 | Insulin dependent diabetes mellitus - poor control           |
| 83485 | 66Am.00 | Insulin dose changed                                         |
| 85991 | C10FM11 | Type II diabetes mellitus with persistent microalbuminuria   |
| 91646 | C10F411 | Type II diabetes mellitus with ulcer                         |
| 91942 | C10E311 | Type I diabetes mellitus with multiple complications         |
| 91943 | C10EC11 | Type I diabetes mellitus with polyneuropathy                 |
| 93468 | C10EG00 | Type 1 diabetes mellitus with peripheral angiopathy          |
| 93727 | C10FE11 | Type II diabetes mellitus with diabetic cataract             |
| 93875 | C10E712 | Insulin dependent diabetes mellitus with retinopathy         |
| 93878 | C10E511 | Type I diabetes mellitus with ulcer                          |
| 93922 | C104000 | Diabetes mellitus, juvenile type, with renal manifestation   |
| 94383 | C10N000 | Secondary diabetes mellitus without complication             |
| 94699 | ZRB5.00 | Diabetes treatment satisfaction questionnaire                |
| 95343 | C10E711 | Type I diabetes mellitus with retinopathy                    |
| 95539 | C10FS00 | Maternally inherited diabetes mellitus                       |
| 95636 | C10ER00 | Latent autoimmune diabetes mellitus in adult                 |
| 95992 | C108A11 | Type I diabetes mellitus without complication                |
| 96010 | 66Ap.00 | Insulin treatment initiated                                  |
| 96235 | C10E911 | Type I diabetes mellitus maturity onset                      |
| 96506 | C10G000 | Secondary pancreatic diabetes mellitus without complication  |
| 97446 | C108912 | Type 1 diabetes mellitus maturity onset                      |
| 97474 | C108412 | Unstable type 1 diabetes mellitus                            |
| 97849 | C10E912 | Insulin dependent diabetes maturity onset                    |

|                                  |                                                                             |                                                              |
|----------------------------------|-----------------------------------------------------------------------------|--------------------------------------------------------------|
| 97894                            | C10EP11                                                                     | Type I diabetes mellitus with exudative maculopathy          |
| 98071                            | C10E112                                                                     | Insulin-dependent diabetes mellitus with ophthalmic comps    |
| 98392                            | C10C.12                                                                     | Maturity onset diabetes in youth type 1                      |
| 98616                            | C10F211                                                                     | Type II diabetes mellitus with neurological complications    |
| 98704                            | C10E512                                                                     | Insulin dependent diabetes mellitus with ulcer               |
| 98723                            | C10FD11                                                                     | Type II diabetes mellitus with hypoglycaemic coma            |
| 98954                            | 3883.00                                                                     | Diabetes treatment satisfaction questionnaire                |
| 99231                            | C108B11                                                                     | Type I diabetes mellitus with mononeuropathy                 |
| 99311                            | C10E111                                                                     | Type I diabetes mellitus with ophthalmic complications       |
| 99716                            | C10EE12                                                                     | Insulin dependent diabetes mellitus with hypoglycaemic coma  |
| 99719                            | C10EA12                                                                     | Insulin-dependent diabetes without complication              |
| 100292                           | Cyu2300                                                                     | [X]Unspecified diabetes mellitus with renal complications    |
| 100347                           | C10A500                                                                     | Malnutritn-relat diabetes melitus wth periph circul complctn |
| 101311                           | C10EC12                                                                     | Insulin dependent diabetes mellitus with polyneuropathy      |
| 106360                           | K27y700                                                                     | Erectile dysfunction due to diabetes mellitus                |
| <b>ICD-10</b>                    |                                                                             |                                                              |
| E11.2                            | Type II Diabetes Mellitus With renal complications                          |                                                              |
| E11.3                            | Type II Diabetes Mellitus With ophthalmic complications                     |                                                              |
| E11.4                            | Type II Diabetes Mellitus With neurological complications                   |                                                              |
| E11.5                            | Type II Diabetes Mellitus With peripheral circulatory complications         |                                                              |
| E11.6                            | Type II Diabetes Mellitus With other specified complications                |                                                              |
| E11.7                            | Type II Diabetes Mellitus With multiple complications                       |                                                              |
| E11.8                            | Type II Diabetes Mellitus With unspecified complications                    |                                                              |
| E11.9                            | Type II Diabetes Mellitus Without complications                             |                                                              |
| E10.2                            | Type I Diabetes Mellitus With renal complications                           |                                                              |
| E10.3                            | Type I Diabetes Mellitus With ophthalmic complications                      |                                                              |
| E10.4                            | Type I Diabetes Mellitus With neurological complications                    |                                                              |
| E10.5                            | Type I Diabetes Mellitus With peripheral circulatory complications          |                                                              |
| E10.6                            | Type I Diabetes Mellitus With other specified complications                 |                                                              |
| E10.7                            | Type I Diabetes Mellitus With multiple complications                        |                                                              |
| E10.8                            | Type I Diabetes Mellitus With unspecified complications                     |                                                              |
| E10.9                            | Type I Diabetes Mellitus Without complications                              |                                                              |
| E13.2                            | Other specified Diabetes Mellitus With renal complications                  |                                                              |
| E13.3                            | Other specified Diabetes Mellitus With ophthalmic complications             |                                                              |
| E13.4                            | Other specified Diabetes Mellitus With neurological complications           |                                                              |
| E13.5                            | Other specified Diabetes Mellitus With peripheral circulatory complications |                                                              |
| E13.6                            | Other specified Diabetes Mellitus With other specified complications        |                                                              |
| E13.7                            | Other specified Diabetes Mellitus With multiple complications               |                                                              |
| E13.8                            | Other specified Diabetes Mellitus With unspecified complications            |                                                              |
| E13.9                            | Other specified Diabetes Mellitus Without complications                     |                                                              |
| <b>Peripheral artery disease</b> |                                                                             |                                                              |
| <b>medcode</b>                   | <b>readcode</b>                                                             | <b>readterm</b>                                              |
| 1318                             | G700.00                                                                     | Aortic atherosclerosis                                       |
| 1517                             | G73z000                                                                     | Intermittent claudication                                    |
| 1735                             | G71..00                                                                     | Aortic aneurysm                                              |
| 1736                             | 7A14.11                                                                     | Aortic aneurysm repair                                       |
| 1826                             | G73..12                                                                     | Ischaemia of legs                                            |
| 1867                             | G714.00                                                                     | Abdominal aortic aneurysm without mention of rupture         |
| 2066                             | 7A48z00                                                                     | Other bypass of femoral artery or popliteal artery NOS       |
| 2760                             | G73zz00                                                                     | Peripheral vascular disease NOS                              |
| 2761                             | 7A12100                                                                     | Bypass bifurc aorta by anastom aorta to femoral artery NEC   |
| 3530                             | G73z.00                                                                     | Peripheral vascular disease NOS                              |
| 3778                             | 7A12311                                                                     | Aorto biiliac graft                                          |
| 4325                             | G73yz00                                                                     | Other specified peripheral vascular disease NOS              |
| 5597                             | 7A16400                                                                     | Bypass of abdominal aorta by anastomosis aorta to aorta NEC  |
| 5640                             | G70..00                                                                     | Atherosclerosis                                              |
| 5702                             | G73..11                                                                     | Peripheral ischaemic vascular disease                        |

|       |         |                                                              |
|-------|---------|--------------------------------------------------------------|
| 5943  | G73..00 | Other peripheral vascular disease                            |
| 6256  | 7A4B200 | Percutaneous transluminal embolectomy of femoral artery      |
| 6308  | M271.12 | Ischaemic leg ulcer                                          |
| 6356  | 7A4B000 | Percutaneous transluminal angioplasty of femoral artery      |
| 6617  | 7A49z00 | Reconstruction of femoral or popliteal artery NOS            |
| 6827  | G73..13 | Peripheral ischaemia                                         |
| 6872  | G71z.00 | Aortic aneurysm NOS                                          |
| 7111  | 7A44300 | Insertion of iliac artery stent                              |
| 9099  | 7A47.00 | Other emergency bypass of femoral artery or popliteal artery |
| 9119  | 7A4A200 | Open embolectomy of femoral artery                           |
| 9759  | G718.00 | Leaking abdominal aortic aneurysm                            |
| 10827 | 7A44000 | Percutaneous transluminal angioplasty of iliac artery        |
| 11430 | G715000 | Thoracoabdominal aortic aneurysm, ruptured                   |
| 11766 | 7A47.16 | Other emergency bypass of femoral artery                     |
| 12331 | 7A48.15 | Other bypass of popliteal artery                             |
| 12736 | C10F500 | Type 2 diabetes mellitus with gangrene                       |
| 13572 | G713.11 | Ruptured abdominal aortic aneurysm                           |
| 14797 | G702.00 | Extremity artery atheroma                                    |
| 14895 | 7A12111 | Aorto bifemoral graft                                        |
| 15302 | G742z00 | Peripheral arterial embolism and thrombosis NOS              |
| 15304 | G715.00 | Ruptured aortic aneurysm NOS                                 |
| 15532 | 7A12300 | Bypass bifurcation aorta by anastom aorta to iliac artery    |
| 16034 | G716.00 | Aortic aneurysm without mention of rupture NOS               |
| 16260 | G702z00 | Extremity artery atheroma NOS                                |
| 16284 | G701.00 | Renal artery atherosclerosis                                 |
| 16363 | 7A4A211 | Open thrombectomy of femoral artery                          |
| 16993 | 14AE.00 | H/O: aortic aneurysm                                         |
| 17220 | 7A13.11 | Emergency repair of aortic aneurysm                          |
| 17328 | 7A1..00 | Aorta operations                                             |
| 17336 | 7A4A212 | Open femoral embolectomy                                     |
| 17345 | G714.11 | AAA - Abdominal aortic aneurysm without mention of rupture   |
| 17767 | G713.00 | Abdominal aortic aneurysm which has ruptured                 |
| 18030 | 7A4B800 | Percut translum thrombolysis femoral graft streptokinase     |
| 18038 | 7A50200 | Revision of reconstruction involving femoral artery          |
| 18060 | 7A48.14 | Other bypass of femoral artery                               |
| 18816 | 7A49200 | Endarterectomy of femoral artery NEC                         |
| 19825 | 5593    | Femoral arteriogram abnormal                                 |
| 19996 | 7A14400 | Replace aneurysm abdominal aorta by anast aorta to aorta NEC |
| 20078 | 7A18z00 | Plastic repair of aorta NOS                                  |
| 20657 | 7A50.00 | Revision of reconstruction of artery                         |
| 20892 | 7A4A.13 | Other open operations on popliteal artery                    |
| 21927 | 7A41.00 | Other bypass of iliac artery                                 |
| 22016 | 7A48E00 | Femoro-femoral prosthetic cross over graft                   |
| 23352 | 7A10100 | Bypass aorta by anastomosis axillary to femoral artery NEC   |
| 23871 | G73y100 | Peripheral angiopathic disease EC NOS                        |
| 24097 | 7A48300 | Bypass popliteal artery by pop/pop a anast c vein graft NEC  |
| 24229 | 7A44400 | Percutaneous transluminal insertion of iliac artery stent    |
| 24327 | M271000 | Ischaemic ulcer diabetic foot                                |
| 24371 | 7A18.00 | Plastic repair of aorta                                      |
| 24677 | 7A4Ay00 | Other open operation on femoral or popliteal artery OS       |
| 24692 | 7A48.00 | Other bypass of femoral artery or popliteal artery           |
| 25735 | 7A1z.00 | Aorta operations NOS                                         |
| 26232 | 7A14411 | Tube graft of Abdominal aortic aneurysm                      |
| 27580 | 7A48000 | Bypass femoral artery by fem/pop art anast c prosthesis NEC  |
| 28030 | 7A48200 | Bypass femoral artery by fem/pop art anast c vein graft NEC  |
| 28119 | 7A4A100 | Repair of popliteal artery NEC                               |
| 28125 | 7A49.14 | Reconstruction of popliteal artery                           |
| 28166 | 7A12112 | Dacron aortofemoral Y graft                                  |
| 28616 | 7A41100 | Bypass iliac artery by iliac/femoral artery anastomosis NEC  |

|       |         |                                                              |
|-------|---------|--------------------------------------------------------------|
| 28777 | 7A49000 | Endarterectomy and patch repair of femoral artery            |
| 28894 | 7A44y00 | Other specified transluminal operation on iliac artery       |
| 29112 | 7A4B100 | Percutaneous transluminal angioplasty of popliteal artery    |
| 30296 | 7A1A000 | Percutaneous transluminal balloon angioplasty of aorta       |
| 30466 | 7A1A100 | Percutaneous transluminal angioplasty of aorta NEC           |
| 30989 | 7A41311 | Femoro-femoral prosthetic cross over graft                   |
| 31053 | R054300 | [D]Widespread diabetic foot gangrene                         |
| 31338 | 7A49.00 | Reconstruction of femoral artery or popliteal artery         |
| 31613 | 7A13.00 | Emergency replacement of aneurysmal segment of aorta         |
| 31822 | 7A15.00 | Other emergency bypass of segment of aorta                   |
| 32403 | C107.11 | Diabetes mellitus with gangrene                              |
| 32492 | 7A41900 | Bypass common iliac artery by aorta/com iliac art anast NEC  |
| 32556 | C107.12 | Diabetes with gangrene                                       |
| 33430 | 7A19400 | Operation on aneurysm of aorta NEC                           |
| 33555 | 7A4A000 | Repair of femoral artery NEC                                 |
| 33807 | C107200 | Diabetes mellitus, adult with gangrene                       |
| 34037 | 7A43300 | Open insertion of iliac artery stent                         |
| 34152 | G73y000 | Diabetic peripheral angiopathy                               |
| 34153 | 7A10200 | Axillo-bifemoral bypass graft                                |
| 35023 | 7A1y.00 | Other specified operations on aorta                          |
| 35399 | C107.00 | Diabetes mellitus with peripheral circulatory disorder       |
| 36008 | 7A19100 | Endarterectomy of aorta NEC                                  |
| 36065 | 7A42011 | Endarterectomy and patch repair of common iliac artery       |
| 36136 | 7A49300 | Endarterectomy of popliteal artery NEC                       |
| 36443 | 7A41300 | Bypass iliac artery by femoral/femoral art anastomosis NEC   |
| 36651 | 7A14z00 | Other replacement of aneurysmal segment of aorta NOS         |
| 36928 | 7A19z00 | Other open operation on aorta NOS                            |
| 36952 | 7A12.00 | Other bypass of bifurcation of aorta                         |
| 37639 | 7A16.00 | Other bypass of segment of aorta                             |
| 37787 | 7A48.12 | Other bypass of common femoral artery                        |
| 37806 | C10FF00 | Type 2 diabetes mellitus with peripheral angiopathy          |
| 38546 | 7A1..11 | Dacron graft operations on aorta                             |
| 38907 | G73y.00 | Other specified peripheral vascular disease                  |
| 38921 | 7A41z00 | Other bypass of iliac artery NOS                             |
| 39039 | 7A42.00 | Reconstruction of iliac artery                               |
| 39437 | 7A4A300 | Open embolectomy popliteal artery                            |
| 39776 | 7A47.14 | Other emergency bypass of popliteal artery                   |
| 39877 | 7A48400 | Bypass femoral artery by fem/tib art anast c prosthesis NEC  |
| 39962 | 7A18000 | Plastic repair of aorta and end to end anastomosis of aorta  |
| 40302 | 7A10300 | Axillo-unifemoral PTFE bypass graft                          |
| 40397 | 7A4A.00 | Other open operations on femoral artery or popliteal artery  |
| 40401 | C109500 | Non-insulin dependent diabetes mellitus with gangrene        |
| 40619 | 7A4B500 | Percutaneous transluminal embolisation of popliteal artery   |
| 40732 | 7A48.16 | Other bypass of superficial femoral artery                   |
| 40787 | G716000 | Thoracoabdominal aortic aneurysm, without mention of rupture |
| 41768 | 7A41F00 | Ilio-femoral prosthetic cross over graft                     |
| 41823 | 7A48600 | Bypass femoral artery by fem/tib art anast c vein graft NEC  |
| 41825 | 55A2.00 | Lower limb arteriogram abnorm.                               |
| 42115 | 7A48D00 | Bypass popliteal artery by pop/fem artery anastomosis NEC    |
| 42142 | 7A3..00 | Branches of abdominal aorta operations                       |
| 42465 | 7A12312 | Dacron aortoiliac Y graft                                    |
| 42640 | 7A48y00 | Other bypass of femoral artery or popliteal artery OS        |
| 42645 | 7A4A311 | Open thrombectomy of popliteal artery                        |
| 42751 | 7A16z00 | Other bypass of segment of aorta NOS                         |
| 43108 | 7A14.00 | Other replacement of aneurysmal segment of aorta             |
| 43179 | 7A19000 | Endarterectomy of aorta and patch repair of aorta            |
| 43648 | 7A41211 | Emergency femoro-femoral prosthetic cross over graft         |
| 43651 | 7A47000 | Emerg bypass femoral art by fem/pop art anast c prosth NEC   |
| 44250 | 7A41000 | Emerg bypass iliac art by iliac/femoral art anastomosis NEC  |



|       |         |                                                              |
|-------|---------|--------------------------------------------------------------|
| 44430 | 7A42111 | Endarterectomy of common iliac artery NEC                    |
| 44553 | 7A14300 | Replace aneurys infrarenal aorta by anast aorta to aorta NEC |
| 45428 | 7A48C00 | Bypass femoral artery by femoral/femoral art anastomosis NEC |
| 45474 | 7A13z00 | Emergency replacement of aneurysmal segment of aorta NOS     |
| 45477 | 7A13y00 | Emergency replacement of aneurysmal segment of aorta OS      |
| 45521 | G714000 | Juxtarenal aortic aneurysm                                   |
| 46150 | C109512 | Type 2 diabetes mellitus with gangrene                       |
| 47562 | 7A43111 | Open embolectomy of common iliac artery                      |
| 47835 | 7A49600 | Profundoplasty of femoral artery NEC                         |
| 48700 | 7A48700 | Bypass popliteal artery by pop/tib a anast c vein graft NEC  |
| 48755 | 7A12000 | Emerg bypass bifurc aorta by anast aorta to femoral artery   |
| 48768 | 7A1Az00 | Transluminal operation on aorta NOS                          |
| 48939 | 7A47C00 | Emerg bypass femoral artery by fem/fem art anastomosis NEC   |
| 49273 | 7A50100 | Revision of reconstruction involving iliac artery            |
| 49319 | 7A4A.14 | Other open operations on superficial femoral artery          |
| 49878 | 7A18100 | Plastic repair of aorta using subclavian flap                |
| 50122 | 7A1A200 | Percutaneous transluminal embolectomy of aortic bifurcation  |
| 50894 | 7A42y00 | Other specified reconstruction of iliac artery               |
| 51166 | 7A11311 | Y graft abdominal Aortic aneurysm                            |
| 51211 | 7A42100 | Endarterectomy of iliac artery NEC                           |
| 51331 | 7A43.00 | Other open operations on iliac artery                        |
| 52289 | 7A4B300 | Percutaneous transluminal embolectomy of popliteal artery    |
| 52342 | 7A47200 | Emerg bypass femoral art by fem/pop a anast c vein graft NEC |
| 52357 | 7A41y00 | Other specified other bypass of iliac artery                 |
| 52358 | 7A11.00 | Replacement of aneurysmal bifurcation of aorta               |
| 52497 | 7A18y00 | Other specified plastic repair of aorta                      |
| 52695 | 7A49100 | Endarterectomy and patch repair of popliteal artery          |
| 52869 | 7A49800 | Reconstruction of femoral artery with vein graft             |
| 53163 | 7A19.00 | Other open operations on aorta                               |
| 53580 | 7A43.11 | Other open operations on common iliac artery                 |
| 53634 | R054200 | [D]Gangrene of toe in diabetic                               |
| 53675 | 7A48A00 | Bypass femoral artery by fem/peron a anast c vein graft NEC  |
| 53891 | 7A1Ay00 | Other specified transluminal operation on aorta              |
| 54071 | 7A50000 | Revision of reconstruction involving aorta                   |
| 54192 | 7A13400 | Emerg replace aneurysm abdom aorta by anast aorta/aorta NEC  |
| 54212 | C109F00 | Non-insulin-dependent d m with peripheral angiopath          |
| 54379 | 7A14200 | Replace aneurys suprarenal aorta by anast aorta to aorta NEC |
| 54899 | C109F11 | Type II diabetes mellitus with peripheral angiopathy         |
| 55319 | 7A18200 | Plastic repair of aorta using patch graft                    |
| 55402 | 7A19200 | Open embolectomy of bifurcation of aorta                     |
| 55445 | 7A14y00 | Other replacement of aneurysmal segment of aorta OS          |
| 55554 | 7A41B00 | Bypass leg artery by aorta/com femoral art anastomosis NEC   |
| 55825 | 7A12y00 | Other specified other bypass of bifurcation of aorta         |
| 55877 | 7A44z00 | Transluminal operation on iliac artery NOS                   |
| 56495 | 7A11100 | Replace aneurysm bifurc aorta by anast aorta to femoral art  |
| 56510 | 7A11300 | Replace aneurysm bifurc aorta by anast aorta to iliac artery |
| 56803 | C107400 | NIDDM with peripheral circulatory disorder                   |
| 57141 | 7A1A.00 | Transluminal operations on aorta                             |
| 57539 | 7A1A.11 | Percutaneous transluminal operations on aorta                |
| 57793 | 7A49400 | Profundoplasty femoral artery & patch repair deep fem artery |
| 59518 | 7A16y00 | Other specified other bypass of segment of aorta             |
| 59534 | 14NB.00 | H/O: Peripheral vascular disease procedure                   |
| 59602 | 7A42012 | Iliac endarterectomy and patch                               |
| 60212 | 7A4A.11 | Other open operations on common femoral artery               |
| 60465 | 7A48500 | Bypass popliteal artery by pop/tib a anast c prosthesis NEC  |
| 60499 | C108600 | Insulin dependent diabetes mellitus with gangrene            |
| 60693 | 7A47300 | Emerg bypass pop art by pop/pop art anast c vein graft NEC   |
| 60699 | C109F12 | Type 2 diabetes mellitus with peripheral angiopathy          |
| 61255 | 7A43100 | Open embolectomy of iliac artery                             |

|       |         |                                                              |
|-------|---------|--------------------------------------------------------------|
| 61256 | 7A43000 | Repair of iliac artery NEC                                   |
| 61974 | 7A48.11 | Other bypass of femoral or popliteal artery by anastomosis   |
| 61978 | 7A16300 | Bypass of infrarenal aorta by anastomosis aorta to aorta NEC |
| 62107 | C109511 | Type II diabetes mellitus with gangrene                      |
| 62301 | 7A11y00 | Replacement of aneurysmal bifurcation of aorta OS            |
| 62775 | 7A47B00 | Emerg bypass pop art by pop/peron art anast c vein graft NEC |
| 62818 | 7A42000 | Endarterectomy and patch repair of iliac artery              |
| 62866 | 7A42z00 | Reconstruction of iliac artery NOS                           |
| 63238 | 7A47.13 | Other emergency bypass of deep femoral artery                |
| 63280 | 7A42.11 | Reconstruction of common iliac artery                        |
| 63357 | C107100 | Diabetes mellitus, adult, + peripheral circulatory disorder  |
| 63368 | 7A4A700 | Repair of femoral artery with temporary silastic shunt       |
| 63396 | 7A49.13 | Reconstruction of femoral artery                             |
| 63408 | 7A13411 | Tube graft abdominal Aortic aneurysm (emergency)             |
| 63605 | 7A49500 | Profundoplasty and patch repair of popliteal artery          |
| 63920 | G713000 | Ruptured suprarenal aortic aneurysm                          |
| 64446 | C108G00 | Insulin dependent diab mell with peripheral angiopathy       |
| 64555 | 7A48100 | Bypass popliteal artery by pop/pop a anast c prosthesis NEC  |
| 64798 | 7A12z00 | Other bypass of bifurcation of aorta NOS                     |
| 65025 | C107z00 | Diabetes mellitus NOS with peripheral circulatory disorder   |
| 65286 | 7A50300 | Revision of reconstruction of popliteal artery               |
| 65669 | 7A49700 | Profundoplasty of popliteal artery NEC                       |
| 65692 | 7A47y00 | Other emergency bypass of femoral or popliteal artery OS     |
| 65813 | 7A17200 | Revision of prosthesis of abdominal aorta NEC                |
| 66232 | 7A13300 | Emerg replace aneurysm infrarenal aorta by anast aorta/aorta |
| 66316 | 7A17100 | Revision of prosthesis of bifurcation of aorta               |
| 66437 | 7A43011 | Repair of common iliac artery NEC                            |
| 66761 | 7A11z00 | Replacement of aneurysmal bifurcation of aorta NOS           |
| 66804 | 7A41C00 | Bypass leg artery by aorta/deep femoral art anastomosis NEC  |
| 66820 | 7A47400 | Emerg bypass femoral art by fem/tib art anast c prosth NEC   |
| 66869 | 7A4A800 | Repair of popliteal artery with temporary silastic shunt     |
| 66879 | 7A47700 | Emerg bypass pop art by pop/tib art anast c vein graft NEC   |
| 66914 | 7A10.00 | Extraanatomic bypass of aorta                                |
| 66917 | 7A41600 | Emerg bypass leg artery by aorta/com fem art anastomosis NEC |
| 66930 | 7A44100 | Percutaneous transluminal embolectomy of iliac artery        |
| 67083 | 7A49y00 | Reconstruction of femoral or popliteal artery OS             |
| 67818 | 7A47100 | Emerg bypass popliteal art by pop/pop art anast c prosth NEC |
| 67839 | 7A10y00 | Other specified extraanatomic bypass of aorta                |
| 67982 | 7A48800 | Bypass femoral artery by fem/peron a anast c prosthesis NEC  |
| 68141 | 7A41400 | Emerg bypass comm iliac art by aorta/com iliac art anast NEC |
| 68320 | 7A47z00 | Other emergency bypass of femoral or popliteal artery NOS    |
| 68412 | 7A48B00 | Bypass popliteal art by pop/peron art anast c vein graft NEC |
| 69124 | C107300 | IDDM with peripheral circulatory disorder                    |
| 69519 | 7A49900 | Reconstruction of popliteal artery with vein graft           |
| 69922 | 7A11200 | Emerg repl aneurysm bifurc aorta by anast aorta to iliac a   |
| 69993 | C10E600 | Type 1 diabetes mellitus with gangrene                       |
| 70446 | 7A1B000 | Endovascular stenting infrarenal abdominal aortic aneurysm   |
| 70448 | C107000 | Diabetes mellitus, juvenile +peripheral circulatory disorder |
| 70922 | 7A47D00 | Emerg bypass popliteal artery by pop/fem art anastomosis NEC |
| 71041 | 7A4B400 | Percutaneous transluminal embolisation of femoral artery     |
| 72448 | 7A41200 | Emerg bypass iliac artery by femoral/femoral art anast NEC   |
| 72491 | 7A47.11 | Other emerg bypass femoral or popliteal art by anastomosis   |
| 73822 | 7A49.11 | Reconstruction of common femoral artery                      |
| 73961 | Gyu7400 | [X]Other specified peripheral vascular diseases              |
| 81445 | 7A4B900 | Percutaneous transluminal insertion of stent femoral artery  |
| 83577 | 7A1C000 | Endovas ins stent graft for infrarenal abdom aortic aneurysm |
| 86053 | 7A19y00 | Other specified other open operation on aorta                |
| 86810 | 7A1A600 | Percutan transluminal aortic stent graft fenestration NEC    |
| 87370 | 7A1A700 | Percutaneous transluminal aortic stent graft branches NEC    |

|        |         |                                                              |
|--------|---------|--------------------------------------------------------------|
| 89198  | 7A1A500 | Percutaneous transluminal balloon angioplasty stenting aorta |
| 89731  | 7A1AA00 | Percutaneous transluminal insertion of stent into aorta      |
| 90549  | 7A1B400 | Endovascular stenting of aortic bifurcation NEC              |
| 90861  | 7A1Bz00 | Transluminal operations on aneurysmal segment of aorta NOS   |
| 92925  | 7A11211 | Y graft of abdominal Aortic aneurysm (emergency)             |
| 93468  | C10EG00 | Type 1 diabetes mellitus with peripheral angiopathy          |
| 93627  | 7A1Cz00 | Translum ins stent graft for aneurysmal segment of aorta NOS |
| 93959  | 7A1B.00 | Transluminal operations on aneurysmal segment of aorta       |
| 94069  | 7A1C400 | Endovas insertion of stent graft for aortic bifurcation NEC  |
| 94331  | 7A1C.00 | Translum insert stent graft for aneurysmal segment of aorta  |
| 94682  | 7A1C100 | Endovas insert of stent graft for suprarenal aortic aneurysm |
| 95573  | 7A10000 | Emerg aortic bypass by anastomosis axillary to femoral art   |
| 95721  | 7A17300 | Removal of prosthesis from aorta                             |
| 95976  | 7A1B500 | Endovascular stenting of aorto-uniliac aneurysm              |
| 96255  | 7A47600 | Emerg bypass femoral art by fem/tib a anast c vein graft NEC |
| 96654  | 7A11000 | Emerg repl aneurysm bifurc aorta by anast aorta to fem art   |
| 96809  | 7A49.15 | Reconstruction of superficial femoral artery                 |
| 96912  | 7A1A800 | Transluminal aortic stent graft with fenestration NEC        |
| 97030  | 7A1B100 | Endovascular stenting of suprarenal aortic aneurysm          |
| 97109  | 7A1B700 | Endovascular stenting for aorto-uniliac aneurysm             |
| 97217  | 7A1B800 | Endovascul insert stent infrarenal abdominal aortic aneurysm |
| 97596  | 7A17z00 | Attention to prosthesis of aorta NOS                         |
| 97606  | 7A47.15 | Other emergency bypass of superficial femoral artery         |
| 98082  | 7A15300 | Emerg bypass infrarenal aorta by anastom aorta to aorta NEC  |
| 98174  | G733.00 | Ischaemic foot                                               |
| 98175  | 7A1BD00 | Endovascular insertion of stent for aorto-uniliac aneurysm   |
| 98211  | 7A17.00 | Attention to prosthesis of aorta                             |
| 98565  | 7A1Cy00 | OS translum ins stent graft for aneurysmal segment of aorta  |
| 99676  | 7A47800 | Emerg bypass femoral art by fem/peron art anast c prosth NEC |
| 99722  | 7A13000 | Emerg replace aneurysm asc aorta by anastom aorta to aorta   |
| 99787  | 7A1BB00 | Endovascular ins stent for aortic dissection in any position |
| 99859  | 7A1BC00 | Endovas insert stent for aortic aneurysm of bifurcation NEC  |
| 100036 | 7A41D00 | Bypass iliac artery by iliac/iliac artery anastomosis NEC    |
| 100113 | 7A47.12 | Other emergency bypass of common femoral artery              |
| 100195 | 7A1B600 | Endovascular stenting for aortic aneurysm of bifurcation NEC |
| 100579 | Gyu7000 | [X]Atherosclerosis of other arteries                         |
| 100712 | 7A10z00 | Extraanatomic bypass of aorta NOS                            |
| 101017 | 7A3y.00 | Other specified operations on branches of abdominal aorta    |
| 101195 | G714300 | Aneurysm of suprarenal aorta                                 |
| 101379 | G714200 | Infrarenal abdominal aortic aneurysm                         |
| 101835 | 7A15y00 | Other specified other emergency bypass of segment of aorta   |
| 101866 | G73z012 | Vascular claudication                                        |
| 101910 | 7A41.11 | Other bypass of iliac artery by anastomosis                  |
| 102031 | 7A15400 | Emerg bypass abdominal aorta by anastom aorta to aorta NEC   |
| 102112 | C10E611 | Type I diabetes mellitus with gangrene                       |
| 102684 | 7A10400 | Bypass aorta anastomosis axillary artery bi femoral arteries |
| 102719 | Gyu7200 | [X]Aortic aneurysm of unspecified site, nonruptured          |
| 102725 | Gyu7100 | [X]Aortic aneurysm of unspecified site, ruptured             |
| 103427 | 7A1C500 | Endovas insertion of stent graft for aorto-uniliac aneurysm  |
| 104323 | C10F511 | Type II diabetes mellitus with gangrene                      |
| 104639 | C10FF11 | Type II diabetes mellitus with peripheral angiopathy         |
| 104815 | 7A15z00 | Other emergency bypass of segment of aorta NOS               |
| 105136 | 7A18400 | Revision of plastic repair of aorta                          |
| 105317 | G734.00 | Peripheral arterial disease                                  |
| 105621 | Gyu7800 | [X]Aneurysm of aorta in diseases classified elsewhere        |
| 106780 | 7A1B900 | Endovascular insertion stent for suprarenal aortic aneurysm  |
| 107071 | G701011 | ARAS - Atherosclerotic renal artery stenosis                 |
| 107158 | 7A48900 | Bypass popliteal artery by pop/peron art anast c prosth NEC  |
| 107284 | 7A17y00 | Other specified attention to prosthesis of aorta             |

|                                         |                                                        |                                                     |
|-----------------------------------------|--------------------------------------------------------|-----------------------------------------------------|
| 109034                                  | 1M11000                                                | Ischaemic foot pain at rest                         |
| 109051                                  | C10E612                                                | Insulin dependent diabetes mellitus with gangrene   |
| 109217                                  | 1M11100                                                | Ischaemic foot pain when walking                    |
| 114579                                  | G701000                                                | Atherosclerotic renal artery stenosis               |
| 18499                                   | 662U.00                                                | Peripheral vascular disease monitoring              |
| <b>ICD-10</b>                           |                                                        |                                                     |
| I70                                     | Atherosclerosis                                        |                                                     |
| I71                                     | Aortic aneurysm and dissection                         |                                                     |
| I72                                     | Other aneurysm and dissection                          |                                                     |
| I74                                     | Arterial embolism and thrombosis                       |                                                     |
| I73.9                                   | Peripheral vascular disease, unspecified               |                                                     |
| I79.2                                   | Peripheral angiopathy in diseases classified elsewhere |                                                     |
| <b>Chronic Kidney Disease (stage≥3)</b> |                                                        |                                                     |
| <b>medcode</b>                          | <b>readcode</b>                                        | <b>readterm</b>                                     |
| 350                                     | K06..00                                                | Renal failure unspecified                           |
| 512                                     | K05..00                                                | Chronic renal failure                               |
| 2994                                    | 7L1A100                                                | Peritoneal dialysis                                 |
| 2996                                    | 7L1A200                                                | Haemodialysis NEC                                   |
| 6712                                    | K050.00                                                | End stage renal failure                             |
| 8330                                    | K0D..00                                                | End-stage renal disease                             |
| 11773                                   | 7L1A.11                                                | Dialysis for renal failure                          |
| 12479                                   | 1Z13.00                                                | Chronic kidney disease stage 4                      |
| 12566                                   | 1Z12.00                                                | Chronic kidney disease stage 3                      |
| 12585                                   | 1Z14.00                                                | Chronic kidney disease stage 5                      |
| 20073                                   | 7L1A000                                                | Renal dialysis                                      |
| 20196                                   | 14V2.00                                                | H/O: renal dialysis                                 |
| 28158                                   | TB11.00                                                | Kidney dialysis with complication, without blame    |
| 44422                                   | 14V2.11                                                | H/O: kidney dialysis                                |
| 53852                                   | K05..12                                                | End stage renal failure                             |
| 53940                                   | Kyu2100                                                | [X]Other chronic renal failure                      |
| 61930                                   | Kyu2.00                                                | [X]Renal failure                                    |
| 63502                                   | Z91A.00                                                | Peritoneal dialysis bag procedure                   |
| 64828                                   | 7L1A600                                                | Peritoneal dialysis NEC                             |
| 66714                                   | TB11.11                                                | Renal dialysis with complication, without blame     |
| 69760                                   | ZVu3G00                                                | [X]Other dialysis                                   |
| 94793                                   | 1Z1B.00                                                | Chronic kidney disease stage 3 with proteinuria     |
| 94965                                   | 1Z15.00                                                | Chronic kidney disease stage 3A                     |
| 95122                                   | 1Z1H.00                                                | Chronic kidney disease stage 4 with proteinuria     |
| 95123                                   | 1Z1C.00                                                | Chronic kidney disease stage 3 without proteinuria  |
| 95145                                   | 1Z1B.11                                                | CKD stage 3 with proteinuria                        |
| 95175                                   | 1Z1E.00                                                | Chronic kidney disease stage 3A without proteinuria |
| 95176                                   | 1Z1E.11                                                | CKD stage 3A without proteinuria                    |
| 95177                                   | 1Z1G.00                                                | Chronic kidney disease stage 3B without proteinuria |
| 95178                                   | 1Z1F.00                                                | Chronic kidney disease stage 3B with proteinuria    |
| 95179                                   | 1Z16.00                                                | Chronic kidney disease stage 3B                     |
| 95180                                   | 1Z1F.11                                                | CKD stage 3B with proteinuria                       |
| 95188                                   | 1Z1C.11                                                | CKD stage 3 without proteinuria                     |
| 95405                                   | 1Z1L.00                                                | Chronic kidney disease stage 5 without proteinuria  |
| 95406                                   | 1Z1J.00                                                | Chronic kidney disease stage 4 without proteinuria  |
| 95408                                   | 1Z1D.00                                                | Chronic kidney disease stage 3A with proteinuria    |
| 95508                                   | 1Z1K.00                                                | Chronic kidney disease stage 5 with proteinuria     |
| 95571                                   | 1Z1D.11                                                | CKD stage 3A with proteinuria                       |
| 97587                                   | 1Z1J.11                                                | CKD stage 4 without proteinuria                     |
| 97683                                   | 1Z1L.11                                                | CKD stage 5 without proteinuria                     |
| 99160                                   | 1Z1K.11                                                | CKD stage 5 with proteinuria                        |
| 99312                                   | 1Z1H.11                                                | CKD stage 4 with proteinuria                        |
| 100633                                  | 1Z1G.11                                                | CKD stage 3B without proteinuria                    |
| 104619                                  | K053.00                                                | Chronic kidney disease stage 3                      |
| 104963                                  | K054.00                                                | Chronic kidney disease stage 4                      |

|               |         |                                                                                             |
|---------------|---------|---------------------------------------------------------------------------------------------|
| 105151        | K055.00 | Chronic kidney disease stage 5                                                              |
| 109657        | 1Z1Y.00 | CKD with GFR category G3b & albuminuria category A2                                         |
| 109804        | 1Z1T.00 | CKD with GFR category G3a & albuminuria category A1                                         |
| 109805        | 1Z1V.00 | CKD with GFR category G3a & albuminuria category A2                                         |
| 109857        | 451M.00 | eGFR using cystatin C (CKD-EPI) per 1.73 square metres                                      |
| 109905        | 1Z1W.00 | CKD with GFR category G3a & albuminuria category A3                                         |
| 109963        | 1Z1X.00 | CKD with GFR category G3b & albuminuria category A1                                         |
| 109990        | 1Z1Z.00 | CKD with GFR category G3b & albuminuria category A3                                         |
| <b>ICD-10</b> |         |                                                                                             |
| I13.1         |         | Hypertensive heart and renal disease with renal failure                                     |
| I13.2         |         | Hypertensive heart and renal disease with both (congestive) heart failure and renal failure |
| N18.3         |         | Chronic kidney disease, stage 3                                                             |
| N18.4         |         | Chronic kidney disease, stage 4                                                             |
| N18.5         |         | Chronic kidney disease, stage 5                                                             |
| N19           |         | Unspecified kidney failure                                                                  |
| I12.0         |         | Hypertensive renal disease with renal failure                                               |

**eTable 2.** Association Between Cardiovascular Events and Recent Prior Gout Flare: Sensitivity Analyses of the Nested Case-Control Study

|                                                                                                                                        | Exposure window            | No. (%) of individuals | No. (%) of controls | Unadjusted difference, % (95%CI) | aOR (95%CI) <sup>j</sup> |
|----------------------------------------------------------------------------------------------------------------------------------------|----------------------------|------------------------|---------------------|----------------------------------|--------------------------|
| <b>Applying shorter time intervals for exposure to accrue<sup>a</sup></b>                                                              | 0-15 days                  | 46 (0.4)               | 178 (0.3)           | 0.1 (0.0-0.3)                    | 2.07 (1.35-3.18)         |
|                                                                                                                                        | 16-30 days                 | 55 (0.5)               | 170 (0.3)           | 0.2 (0.0-0.4)                    | 2.39 (1.57-3.64)         |
|                                                                                                                                        | 31-60 days                 | 103 (1.0)              | 395 (0.8)           | 0.2 (0.0-0.5)                    | 1.73 (1.31-2.28)         |
|                                                                                                                                        | 61-90 days                 | 85 (0.8)               | 325 (0.6)           | 0.2 (0.0-0.4)                    | 1.50 (1.10-2.05)         |
|                                                                                                                                        | 91-120 days                | 85 (0.8)               | 303 (0.6)           | 0.2 (0.0-0.5)                    | 1.66 (1.22-2.25)         |
|                                                                                                                                        | 121-150 days               | 82 (0.8)               | 341 (0.7)           | 0.1 (-0.1-0.4)                   | 1.25 (0.92-1.71)         |
|                                                                                                                                        | 151-180 days               | 66 (0.6)               | 321 (0.6)           | 0.0 (-0.2-0.2)                   | 0.89 (0.64-1.24)         |
|                                                                                                                                        | >180 days or no gout flare | 9953 (95.0)            | 50066 (96.1)        | -1.1 (-1.7 - -0.5)               | Reference                |
| <b>Excluding patients with gout for &lt;1 year<sup>b</sup></b>                                                                         | 0-60 days                  | 38 (0.4)               | 147 (0.3)           | 0.1 (0.0-0.3)                    | 1.74 (1.17-2.60)         |
|                                                                                                                                        | 61-120 days                | 44 (0.5)               | 141 (0.3)           | 0.2 (0.0-0.4)                    | 1.86 (1.28-2.72)         |
|                                                                                                                                        | 121-180 days               | 45 (0.5)               | 163 (0.4)           | 0.1 (-0.1-0.3)                   | 1.39 (0.96-2.01)         |
|                                                                                                                                        | >180 days or no gout flare | 8690 (98.6)            | 43611 (99.0)        | -0.4 (-0.8 - -0.1)               | Reference                |
| <b>Excluding patients with cardiovascular event on the same date as the consultation for the gout flare<sup>c</sup></b>                | 0-60 days                  | 199 (1.9)              | 703 (1.4)           | 0.5 (0.2-0.9)                    | 1.89 (1.53-2.33)         |
|                                                                                                                                        | 61-120 days                | 170 (1.6)              | 619 (1.2)           | 0.4 (0.1-0.8)                    | 1.58 (1.26-1.97)         |
|                                                                                                                                        | 121-180 days               | 148 (1.4)              | 651 (1.3)           | 0.2 (-0.2-0.5)                   | 1.06 (0.84-1.34)         |
|                                                                                                                                        | >180 days or no gout flare | 9953 (95.1)            | 50041 (96.2)        | -1.1 (-1.7 - -0.6)               | Reference                |
| <b>Excluding patients with cardiovascular diseases prior to gout diagnosis<sup>d</sup></b>                                             | 0-60 days                  | 91 (1.8)               | 537 (1.3)           | 0.5 (0.0-1.0)                    | 2.17 (1.51-3.11)         |
|                                                                                                                                        | 61-120 days                | 67 (1.3)               | 441 (1.1)           | 0.3 (0.0-0.7)                    | 1.51 (1.03-2.21)         |
|                                                                                                                                        | 121-180 days               | 76 (1.5)               | 487 (1.2)           | 0.3 (-0.1-0.8)                   | 1.21 (0.84-1.74)         |
|                                                                                                                                        | >180 days or no gout flare | 4793 (95.3)            | 39869 (96.5)        | -1.1 (-1.9 - -0.3)               | Reference                |
| <b>Excluding patients without record of gout flares<sup>e</sup></b>                                                                    | 0-60 days                  | 204 (4.3)              | 743 (3.2)           | 1.1 (0.3-1.9)                    | 2.15 (1.38-3.33)         |
|                                                                                                                                        | 61-120 days                | 170 (3.6)              | 628 (2.7)           | 0.9 (0.2-1.6)                    | 1.80 (1.20-2.69)         |
|                                                                                                                                        | 121-180 days               | 148 (3.1)              | 662 (2.8)           | 0.3 (0.0-1.0)                    | 1.53 (1.01-2.29)         |
|                                                                                                                                        | >180 days                  | 4211 (89.0)            | 21353 (91.3)        | -2.3 (-3.6 - -1.1)               | Reference                |
| <b>Changing reference period to 180-240 days prior to cardiovascular event<sup>f</sup></b>                                             | 0-60 days                  | 204 (1.9)              | 743 (1.4)           | 0.5 (0.2-0.9)                    | 2.17 (1.21-3.90)         |
|                                                                                                                                        | 61-120 days                | 170 (1.6)              | 628 (1.2)           | 0.4 (0.1-0.8)                    | 1.82 (1.04-3.19)         |
|                                                                                                                                        | 121-180 days               | 148 (1.4)              | 662 (1.3)           | 0.1 (-0.1-0.5)                   | 1.55 (0.89-2.27)         |
|                                                                                                                                        | 180-240 days               | 134 (1.3)              | 620 (1.2)           | 0.1 (-0.2-0.4)                   | Reference                |
|                                                                                                                                        | >240 days or no gout flare | 9819 (93.7)            | 49446 (94.9)        | -1.2 (-1.8 - -0.5)               | 1.01 (0.67-1.54)         |
| <b>Considering fatal cardiovascular event as outcome<sup>g</sup></b>                                                                   | 0-60 days                  | 67 (1.7)               | 67 (0.5)            | 1.2 (0.7-1.8)                    | 4.76 (1.69-8.43)         |
|                                                                                                                                        | 61-120 days                | 41 (1.1)               | 61 (0.4)            | 0.6 (0.2-1.0)                    | 2.05 (1.19-3.54)         |
|                                                                                                                                        | 121-180 days               | 84 (2.2)               | 221 (1.6)           | 0.6 (-0.1-1.2)                   | 1.28 (0.74-2.19)         |
|                                                                                                                                        | >180 days or no gout flare | 3697 (95.1)            | 13459 (97.5)        | -2.4 (-3.4 - -1.5)               | Reference                |
| <b>Excluding patients with low/moderate cardiovascular risk<sup>h</sup></b>                                                            | 0-60 days                  | 202 (2.0)              | 518 (1.5)           | 0.5 (0.1-0.9)                    | 1.93 (1.57-2.39)         |
|                                                                                                                                        | 61-120 days                | 170 (1.7)              | 455 (1.3)           | 0.4 (0.0-0.7)                    | 1.60 (1.28-2.01)         |
|                                                                                                                                        | 121-180 days               | 145 (1.4)              | 467 (1.3)           | 0.1 (-0.3-0.4)                   | 1.05 (0.83-1.33)         |
|                                                                                                                                        | >180 days or no gout flare | 9804 (95.0)            | 33740 (95.9)        | -0.9 (-1.5 - -0.3)               | Reference                |
| <b>Excluding patients with cardiovascular event or controls with matched index date before 1<sup>st</sup> January 2010<sup>i</sup></b> | 0-60 days                  | 64 (1.3)               | 330 (1.2)           | 0.1 (-0.1-0.4)                   | 1.71 (1.04-2.82)         |
|                                                                                                                                        | 61-120 days                | 67 (1.4)               | 283 (1.1)           | 0.3 (-0.1-0.8)                   | 1.72 (1.06-2.80)         |
|                                                                                                                                        | 121-180 days               | 59 (1.2)               | 314 (1.2)           | 0.0 (-0.4-0.5)                   | 1.31 (0.80-2.17)         |
|                                                                                                                                        | >180 days or no gout flare | 4637 (96.1)            | 25579 (96.5)        | -0.4 (-1.2-0.3)                  | Reference                |

**Abbreviations:** 95%CI: 95% confidence interval, aOR: adjusted odds ratio, NSAIDs: non-steroidal anti-inflammatory drugs.  
<sup>a</sup> The number of individuals included in this analysis was 62574 (10475 with cardiovascular events and 52099 without cardiovascular events).  
<sup>b</sup> The number of individuals included in this analysis was 52879 (8817 with cardiovascular events and 44062 without cardiovascular events).  
<sup>c</sup> The number of individuals included in this analysis was 62484 (10470 with cardiovascular events and 52014 without cardiovascular events).  
<sup>d</sup> The number of individuals included in this analysis was 46361 (5027 with cardiovascular events and 41334 without cardiovascular events).  
<sup>e</sup> The number of individuals included in this analysis was 28119 (4733 with cardiovascular events and 23386 without cardiovascular events).  
<sup>f</sup> The number of individuals included in this analysis was 62574 (10475 with cardiovascular events and 52099 without cardiovascular events).  
<sup>g</sup> The number of individuals included in this analysis was 17697 (3889 with cardiovascular events and 13808 without cardiovascular events).  
<sup>h</sup> The number of individuals included in this analysis was 45501 (10321 with cardiovascular events and 35180 without cardiovascular events).  
<sup>i</sup> The number of individuals included in this analysis was 31333 (4827 with cardiovascular events and 26506 without cardiovascular events).

<sup>†</sup> These results were based on Model 4 (Adjusted for: age, sex, disease duration, body mass index, smoking status, alcohol intake status, English Index of Multiple Deprivation, Charlson Comorbidity Index, hypertension, atrial fibrillation, hypercholesterolemia, number of hospitalizations in the previous year, number of primary-care consultations in the previous year, European Society of Cardiology cardiovascular risk score, and prescription of diuretics, anti-platelet drugs, statins, urate lowering therapy, anti-hypertensive drugs, NSAIDs, corticosteroids and colchicine). Prescriptions were categorized as current ( $\leq 60$  days), past ( $>60$  days), or not prescribed prior to the cardiovascular event date or matched index date.

**eTable 3.** Association Between Gout Flare and Cardiovascular Event Using Self-Controlled Case Series Analysis: Sensitivity Analyses

| Time period                                                                    | Number of events <sup>a</sup> | Total follow-up time (person-days) | Events / 1000 person-days (95%CI) | Unadjusted absolute difference in event rate / 1000 person-days (95%CI) | aIRR (95%CI) <sup>d</sup> |
|--------------------------------------------------------------------------------|-------------------------------|------------------------------------|-----------------------------------|-------------------------------------------------------------------------|---------------------------|
| <b>Including gout flares treated with colchicine <sup>b</sup> [N=587]</b>      |                               |                                    |                                   |                                                                         |                           |
| 30 to 1 days before flare <sup>c</sup>                                         | 20                            | 17471                              | 1.14                              | -0.23 (-0.75 - 0.29)                                                    | 0.83 (0.53-1.31)          |
| Flare date to 60 days after flare                                              | 62                            | 36108                              | 1.72                              | 0.34 (-0.11 - 0.79)                                                     | 1.26 (1.01-1.81)          |
| 61-120 days after flare                                                        | 70                            | 34929                              | 2.00                              | 0.63 (0.14 - 1.12)                                                      | 1.47 (1.21-1.79)          |
| 121-180 days after flare                                                       | 70                            | 34940                              | 2.00                              | 0.63 (0.14 - 1.12)                                                      | 1.46 (1.00-2.06)          |
| Baseline period: 180 to 31 days before flare + 181-540 days after flare        | 361                           | 262801                             | 1.37                              | Reference                                                               | Reference                 |
| <b>Including gout flares treated with NSAIDs <sup>b</sup> [N=576]</b>          |                               |                                    |                                   |                                                                         |                           |
| 30 to 1 days before flare <sup>c</sup>                                         | 7                             | 17134                              | 0.41                              | -0.96(-1.29 to -0.63)                                                   | 0.30 (0.14-0.63)          |
| Flare date to 60 days after flare                                              | 84                            | 35448                              | 2.37                              | 1.00 (0.47 - 1.53)                                                      | 1.74 (1.26-2.39)          |
| 61-120 days after flare                                                        | 78                            | 34284                              | 2.28                              | 0.91 (0.38 - 1.43)                                                      | 1.59 (1.31-1.93)          |
| 121-180 days after flare                                                       | 50                            | 34278                              | 1.46                              | 0.09 (-0.34 - 0.52)                                                     | 1.07 (0.71-1.60)          |
| Baseline period: 180 to 31 days before flare + 181-540 days after flare        | 353                           | 257908                             | 1.37                              | Reference                                                               | Reference                 |
| <b>Including gout flares treated with corticosteroids <sup>b</sup> [N=146]</b> |                               |                                    |                                   |                                                                         |                           |
| 30 to 1 days before flare <sup>c</sup>                                         | 3                             | 4348                               | 0.69                              | -0.46 (-1.28 - 0.37)                                                    | 0.70 (0.53-1.91)          |
| Flare date to 60 days after flare                                              | 40                            | 8998                               | 4.45                              | 3.30 (1.90 - 4.70)                                                      | 3.82 (2.33-6.27)          |
| 61-120 days after flare                                                        | 21                            | 8681                               | 2.42                              | 1.27 (0.20 - 2.34)                                                      | 2.09 (1.43-3.05)          |
| 121-180 days after flare                                                       | 12                            | 8692                               | 1.38                              | 0.23 (-0.59 - 1.06)                                                     | 1.17 (0.51-2.70)          |
| Baseline period: 180 to 31 days before flare + 181-540 days after flare        | 75                            | 65359                              | 1.15                              | Reference                                                               | Reference                 |

**Abbreviations.** 95%CI: 95% confidence interval, aIRR: incidence risk ratio.

<sup>a</sup> **Events:** cardiovascular events were defined as either acute myocardial infarction or a stroke.

<sup>b</sup> The number of individuals included in each analysis is reported in square brackets.

<sup>c</sup> Induction interval.

<sup>d</sup> the analyses were adjusted for age and calendar season.



**eFigure 1. Self-Controlled Case Series: Schematic Description**

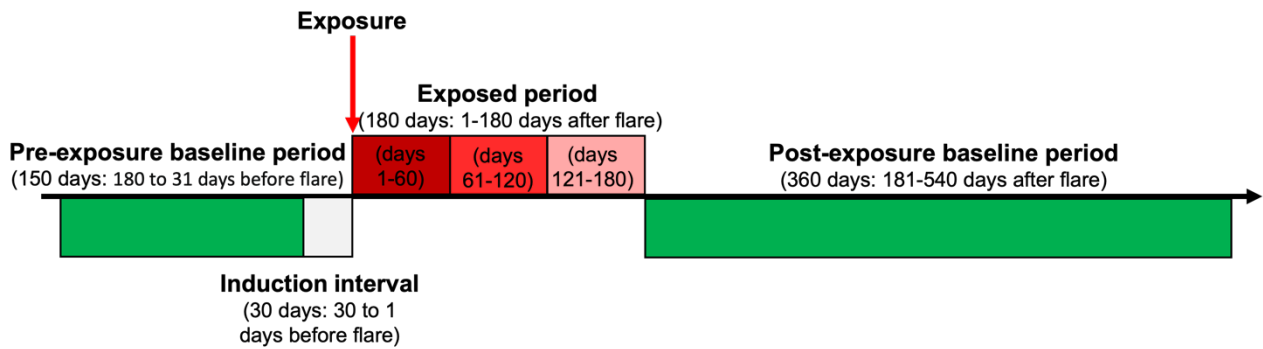

The at-risk period (coloured red) began with the date of gout flare consultation or hospitalization and lasted for 180 days. It was divided as 1-60, 61-120, and 121-180 days. The 30-day interval immediately preceding the exposure was the induction interval (coloured grey). The baseline period (coloured green) consisted of 150 days before the start of induction period and 360 days after the end of the exposed period. All patients included in self-controlled case series had at least one gout flare, and one cardiovascular event in the 720-day observation period.

**eFigure 2.** Cohort Development in a Self-Controlled Case Series Study of Cardiovascular Events After New Diagnosis of Gout

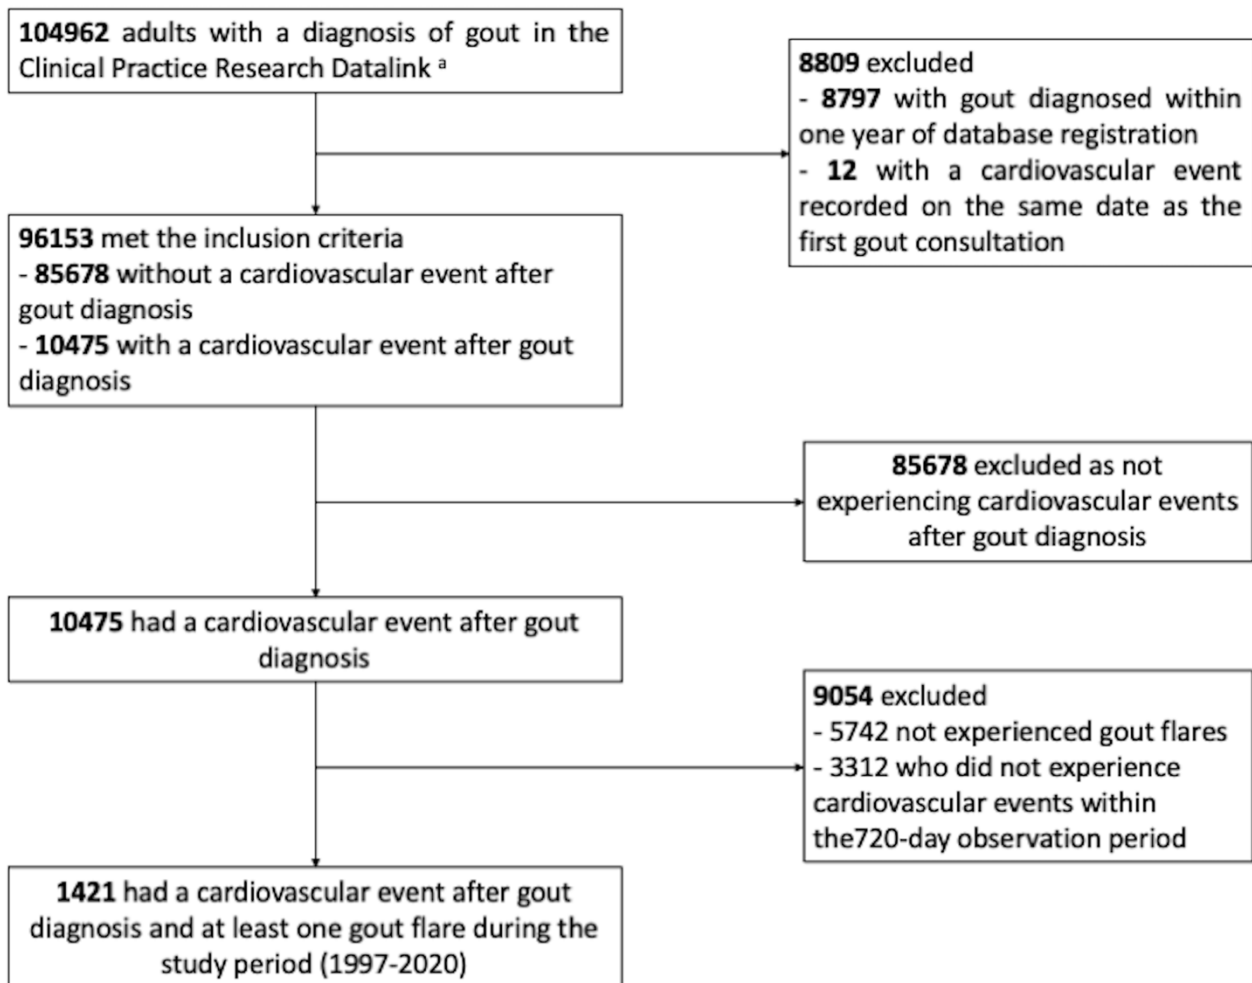

<sup>a</sup> Clinical Practice Research Datalink is a longitudinal primary care database of anonymized health records of 15 million people across the United Kingdom from over 700 practices. It contains data on socio-demographics, lifestyle factors, diagnoses, consultations, and prescriptions recorded in primary care, hospitalization records, and mortality data.

## eReferences.

- [1] Zheng C, Rashid N, Wu YL, et al. Using natural language processing and machine learning to identify gout flares from electronic clinical notes. *Arthritis Care Res (Hoboken)*. 2014;66(11):1740-8.
- [2] MacFarlane LA, Liu CC, Solomon DH, Kim SC. Validation of claims-based algorithms for gout flares. *Pharmacoepidemiol Drug Saf*. 2016;25(7):820-6.
- [3] Rothenbacher D, Primatesta P, Ferreira A, Cea-Soriano L, Rodríguez LAG. Frequency and risk factors of gout flares in a large population-based cohort of incident gout. *Rheumatology (Oxford)* 2011;50(5):973–81.
- [4] Petersen I, Douglas I, Whitaker H. Self controlled case series methods: an alternative to standard epidemiological study designs. *BMJ* 2016;354:i4515.
- [5] Smeeth L, Thomas SL, Hall AJ, Hubbard R, Farrington P, Vallance P. Risk of Myocardial Infarction and Stroke after Acute Infection or Vaccination. *N Engl J Med* 2004;351(25):2611–8.
- [6] Douglas IJ, Smeeth L. Exposure to antipsychotics and risk of stroke: self controlled case series study. *BMJ* 2008;337:616–8.
- [7] Di Bartolomeo S, Marino M, Guastaroba P, Valent F, De Palma R. Self-Controlled Case-Series Study to Verify the Effect of Adherence to Beta-Blockers in Secondary Prevention of Myocardial Infarction. *J Am Heart Assoc* 2015;4(1):e001575
- [8] Sultan AA, Muller S, Whittle R, Roddy E, Mallen C, Clarkson L. Venous thromboembolism in patients with gout and the impact of hospital admission, disease duration and urate-lowering therapy. *CMAJ* 2019;191(22):E597-603.
- [9] Kuo CF, Grainge MJ, Zhang W, Doherty M. Global epidemiology of gout: prevalence, incidence and risk factors. *Nat Rev Rheumatol* 2015;11(11):649–62.
- [10] Kuo CF, Grainge MJ, Mallen C, Zhang W, Doherty M. Comorbidities in patients with gout prior to and following diagnosis: Case-control study. *Ann Rheum Dis* 2016;75(1):210–7.
- [11] Seminog O, Goldacre M. Gout as a risk factor for myocardial infarction and stroke in England: evidence from record linkage studies. *Rheumatology (Oxford)* 2013;52(12):2251–9.
- [12] Clarkson L, Hider S, Belcher J, Heneghan C, Roddy E, Mallen C. Increased risk of vascular disease associated with gout: a retrospective, matched cohort study in the UK clinical practice research datalink. *Ann Rheum Dis* 2015;74(4):642–7.
- [13] Kuo CF, Grainge MJ, Mallen C, Zhang W, Doherty M. Rising burden of gout in the UK but continuing suboptimal management: a nationwide population study. *Ann Rheum Dis* 2015;74(4):661–7.
- [14] Mach F, Baigent C, Catapano AL, et al. 2019 ESC/EAS Guidelines for the management of dyslipidaemias: lipid modification to reduce cardiovascular risk. *Eur Heart J*. 2020;41(1):111-88.
